# Supplementary material for: Duration of dual antiplatelet therapy after percutaneous coronary intervention with drug-eluting stent: systematic review and network meta-analysis
Source: PubMed Central journal article supplement — BMJ. 2019 Jun 27;365:l2222. doi: 10.1136/bmj.l2222 (PMC6595429; doi:10.1136/bmj.l2222), 2019-06-27
Supplement: yins048409.ww1.pdf [file yins048409.ww1.pdf]

# Systematic Review Searching Record

## Literature search details

Language Restriction: none

| Databases and Trial registers:           | Citations |
|------------------------------------------|-----------|
| Databases:                               |           |
| <i>Medline</i>                           | 3276      |
| <i>Embase</i>                            | 8961      |
| <i>Pubmed</i>                            | 3170      |
| <i>Cochrane Library</i>                  | 2955      |
| <i>Web of Science</i>                    | 2396      |
| Total (databases)                        | 20758     |
| After de-duplication:                    | 10803     |
| Trial registers:                         |           |
| <i>USA(ClinicalTrials.gov)</i>           | 342       |
| <i>EU/EEA(Clinicaltrialsregister.eu)</i> | 43        |
| Total (trial registers)                  | 385       |

## Individual strategies

### OID-MEDLINE

| #  | Searches                                                                            | Results |
|----|-------------------------------------------------------------------------------------|---------|
| 1  | drug eluting stent/                                                                 | 9480    |
| 2  | (eluting adj stent\$).ab,ti.                                                        | 11533   |
| 3  | (coronary adj3 angioplast\$).ab,ti.                                                 | 14395   |
| 4  | (coronary adj2 dilatation\$).ab,ti.                                                 | 646     |
| 5  | coronary stent\$.ab,ti.                                                             | 6618    |
| 6  | Percutaneous Coronary Intervention/                                                 | 12010   |
| 7  | (percutaneous coronary adj2 (interven\$ or revascular\$)).ab,ti.                    | 27882   |
| 8  | PCI.ab,ti.                                                                          | 21106   |
| 9  | coronary atherectom\$.ab,ti.                                                        | 742     |
| 10 | 1 or 2 or 3 or 4 or 5 or 6 or 7 or 8 or 9                                           | 63756   |
| 11 | thienopyridine derivative/                                                          | 201     |
| 12 | Platelet Aggregation Inhibitors/                                                    | 32827   |
| 13 | (antiplatelet\$ or anti-platelet\$ or antithrombocytic or anti-thrombocytic).ab,ti. | 27039   |
| 14 | (cyclooxygenase inhibitor\$ or thienopyridine\$).ab,ti.                             | 5946    |
| 15 | (thromboxane A2 adj3 (inhib\$ or antag\$)).ab,ti.                                   | 1483    |
| 16 | aspirin/                                                                            | 42441   |
| 17 | (clopidogrel or ticagrelor or prasugrel).ab,ti.                                     | 11894   |

|    |                                                                                                                                            |         |
|----|--------------------------------------------------------------------------------------------------------------------------------------------|---------|
| 18 | dual antiplatelet.ab,ti.                                                                                                                   | 3673    |
| 19 | 11 or 12 or 13 or 14 or 15 or 16 or 17 or 18                                                                                               | 87740   |
| 20 | 10 and 19                                                                                                                                  | 9474    |
| 21 | letter/                                                                                                                                    | 990423  |
| 22 | editorial/                                                                                                                                 | 460569  |
| 23 | news/                                                                                                                                      | 190233  |
| 24 | exp historical article/                                                                                                                    | 380972  |
| 25 | Anecdotes as topic/                                                                                                                        | 4718    |
| 26 | comment/                                                                                                                                   | 720458  |
| 27 | case report/                                                                                                                               | 1883743 |
| 28 | (letter or comment\$).ti.                                                                                                                  | 131306  |
| 29 | 21 or 22 or 23 or 24 or 25 or 26 or 27 or 28                                                                                               | 3919827 |
| 30 | andomized controlled trial/ or Randomized Controlled Trials as Topic/ or random\$.ti,ab.                                                   | 1036779 |
| 31 | 29 not 30                                                                                                                                  | 3888167 |
| 32 | animals/ not humans/                                                                                                                       | 4442604 |
| 33 | exp Animals, Laboratory/                                                                                                                   | 818238  |
| 34 | exp Animal Experimentation/                                                                                                                | 8720    |
| 35 | exp Models, Animal/                                                                                                                        | 514077  |
| 36 | exp rodentia/                                                                                                                              | 3038363 |
| 37 | (rat or rats or mouse or mice).ti.                                                                                                         | 1263290 |
| 38 | 31 or 32 or 33 or 34 or 35 or 36 or 37                                                                                                     | 9035545 |
| 39 | 20 not 38                                                                                                                                  | 7904    |
| 40 | meta analysis as topic/                                                                                                                    | 16341   |
| 41 | meta analysis/                                                                                                                             | 90338   |
| 42 | (meta analy\$ or metaanaly\$ or metanaly\$ or meta regression).ti,ab.                                                                      | 131945  |
| 43 | ((systematic\$ or evidence\$) adj2 (review\$ or overview\$)).ti,ab.                                                                        | 156076  |
| 44 | (reference list\$ or bibliograph\$ or hand search\$ or manual search\$ or relevant journals).ab.                                           | 37576   |
| 45 | (search strategy or search criteria or systematic search or study selection or data extraction).ab.                                        |         |
| 46 | (search\$ adj4 literature).ab.                                                                                                             |         |
| 47 | (medline or pubmed or cochrane or embase or psychlit or psyclit or psychinfo or cinahl or science citation index or bids or cancerlit).ab. |         |
| 48 | cochrane.jw.                                                                                                                               |         |
| 49 | ((multiple treatment\$ or indirect or mixed) adj2 comparison).ti,ab.                                                                       | 1552    |
| 50 | 40 or 41 or 42 or 43 or 44 or 45 or 46 or 47 or 48 or 49                                                                                   | 350502  |
| 51 | randomized controlled trial.pt. or randomized controlled trial/ or Randomized Controlled Trials as Topic/                                  | 576579  |

|    |                                        |         |
|----|----------------------------------------|---------|
| 52 | controlled clinical trial.pt.          | 92513   |
| 53 | randomi#ed.ab.                         | 497804  |
| 54 | placebo.ab.                            | 190300  |
| 55 | randomly.ab.                           | 292927  |
| 56 | clinical trials as topic.sh.           | 184232  |
| 57 | trial.ti.                              | 184569  |
| 58 | 51 or 52 or 53 or 54 or 55 or 56 or 57 | 1238131 |
| 59 | 50 or 58                               | 1489219 |
| 60 | 39 and 59                              | 3276    |

## Embase

| #  | Searches                                                                                         | Results |
|----|--------------------------------------------------------------------------------------------------|---------|
| 1  | 'drug eluting stent'/exp                                                                         | 29137   |
| 2  | eluting:ab,ti AND stent*:ab,ti                                                                   | 23163   |
| 3  | (coronary NEAR/3 angioplast*):ab,ti                                                              | 17669   |
| 4  | coronary:ab,ti AND artery:ab,ti AND stent*:ab,ti                                                 | 22818   |
| 5  | (coronary NEAR/2 dilatation*):ab,ti                                                              | 931     |
| 6  | 'percutaneous coronary intervention'/exp                                                         | 82385   |
| 7  | percutaneous:ab,ti AND ((coronary NEAR/2 (interven* OR revascular*)):ab,ti)                      | 49705   |
| 8  | pai:ab,ti                                                                                        | 48012   |
| 9  | coronary:ab,ti AND atherectom*:ab,ti                                                             | 2542    |
| 10 | #1 OR #2 OR #3 OR #4 OR #5 OR #6 OR #7 OR #8 OR #9                                               | 155664  |
| 11 | 'antithrombotic agent'/exp                                                                       | 320388  |
| 12 | 'thienopyridine derivative'/exp                                                                  | 2853    |
| 13 | antiplatelet*:ab,ti OR 'anti platelet*':ab,ti OR antithrombotic:ab,ti OR 'anti thrombotic':ab,ti | 2853    |
| 14 | cyclooxygenase:ab,ti AND inhibitor*:ab,ti OR thienopyridine*:ab,ti                               | 44445   |
| 15 | thromboxane:ab,ti AND ((a2 NEAR/3 (inhib* OR antag*)):ab,ti)                                     | 26206   |
| 16 | 'aspirin'/exp                                                                                    | 338     |
| 17 | clopidogrel:ab,ti OR ticagrelor:ab,ti OR prasugrel:ab,ti                                         | 195790  |
| 18 | 'dual antiplatelet':ab,ti                                                                        | 22099   |
| 19 | #11 OR #12 OR #13 OR #14 OR #15 OR #16 OR #17 OR #18                                             | 354904  |
| 20 | #10 AND #19                                                                                      | 35862   |
| 21 | 'letter'/exp                                                                                     | 967228  |
| 22 | 'editorial'/exp                                                                                  | 577964  |
| 23 | 'literature'/exp                                                                                 | 224839  |

|    |                                                                                                                      |         |
|----|----------------------------------------------------------------------------------------------------------------------|---------|
| 24 | 'case report'/exp                                                                                                    | 2316937 |
| 25 | letter:ti OR comment*:ti                                                                                             | 181727  |
| 26 | #21 OR #22 OR #23 OR #24 OR #25                                                                                      | 3929279 |
| 27 | 'andomized controlled trial' OR 'randomized controlled trials as topic'/exp OR random*:ti,ab                         | 1371642 |
| 28 | #26 NOT #27                                                                                                          | 3889761 |
| 29 | 'animals'/exp NOT 'humans'/exp                                                                                       | 5055077 |
| 30 | 'animals, laboratory'/exp                                                                                            | 583894  |
| 31 | 'animal experiment'/exp                                                                                              | 2222227 |
| 32 | 'animal model'/exp                                                                                                   | 1141098 |
| 33 | 'rodent'/exp                                                                                                         | 3496047 |
| 34 | rat:ti OR rats:ti OR mouse:ti OR mice:ti                                                                             | 1494465 |
| 35 | #28 OR #29 OR #30 OR #31 OR #32 OR #33 OR #34                                                                        | 9788820 |
| 36 | #20 NOT #35                                                                                                          | 28766   |
| 37 | 'randomized controlled trial':pt OR 'randomized controlled trial'/exp OR 'randomized controlled trials as topic'/exp | 640643  |
| 38 | 'controlled clinical trial'/de                                                                                       | 426093  |
| 39 | randomi?ed:ab                                                                                                        | 696421  |
| 40 | placebo:ab                                                                                                           | 262505  |
| 41 | randomly:ab                                                                                                          | 377481  |
| 42 | 'clinical trials as topic'/de                                                                                        | 92176   |
| 43 | trial:ti                                                                                                             | 250895  |
| 44 | #37 OR #38 OR #39 OR #40 OR #41 OR #42 OR #43                                                                        | 1590558 |
| 45 | #36 AND #44                                                                                                          | 8961    |

## Pubmed

| # | Searches                                                                                                      | Results |
|---|---------------------------------------------------------------------------------------------------------------|---------|
| 1 | Search drug eluting stent[mh]                                                                                 | 9462    |
| 2 | Search coronary stent*[Title/Abstract]                                                                        | 6720    |
| 3 | Search eluting stent*[Title/Abstract]                                                                         | 11741   |
| 4 | Search coronary angioplast*[Title/Abstract]                                                                   | 12832   |
| 5 | Search ((coronary [Title/Abstract] AND dilatation*[Title/Abstract]))                                          | 4731    |
| 6 | Search Percutaneous Coronary Intervention[mh]                                                                 | 46767   |
| 7 | Search (percutaneous coronary[Title/Abstract]) AND (interven*[Title/Abstract] OR revascular*[Title/Abstract]) | 29380   |
| 8 | Search PCI[Title/Abstract]                                                                                    | 21458   |
| 9 | Search coronary atherectom*[Title/Abstract]                                                                   | 748     |

|    |                                                                                                                                                   |         |
|----|---------------------------------------------------------------------------------------------------------------------------------------------------|---------|
| 10 | Search (1 or 2 or 3 or 4 or 5 or 6 or 7 or 8 or 9)                                                                                                | 78851   |
| 11 | Search Platelet Aggregation Inhibitors[mh]                                                                                                        | 32742   |
| 12 | Search thienopyridine derivative[Text Word]                                                                                                       | 58      |
| 13 | Search (antiplatelet*[Title/Abstract] OR anti-platelet*[Title/Abstract] OR antithrombocytic[Title/Abstract] OR anti-thrombocytic[Title/Abstract]) | 27359   |
| 14 | Search (cyclooxygenase inhibitor*[Title/Abstract] OR thienopyridine*[Title/Abstract])                                                             | 5999    |
| 15 | Search (thromboxane A2[Title/Abstract]) AND (inhib*[Title/Abstract] OR antag*[Title/Abstract])                                                    | 4826    |
| 16 | Search aspirin[mh]                                                                                                                                | 42377   |
| 17 | Search (clopidogrel[Title/Abstract] OR ticagrelor[Title/Abstract] OR prasugrel[Title/Abstract])                                                   | 12012   |
| 18 | Search dual antiplatelet[Text Word]                                                                                                               | 3726    |
| 19 | Search (11 or 12 or 13 or 14 or 15 or 16 or 17 or 18)                                                                                             | 90280   |
| 20 | Search (10 and 19)                                                                                                                                | 10763   |
| 21 | Search (animals[mh]) NOT humans[mh]                                                                                                               | 4464286 |
| 22 | Search Animals, Laboratory[mh]                                                                                                                    | 815511  |
| 23 | Search Animal Experimentation[mh]                                                                                                                 | 8696    |
| 24 | Search Models, Animal[mh]                                                                                                                         | 511363  |
| 25 | Search rodentia[mh]                                                                                                                               | 3029160 |
| 26 | Search (rat[Title] OR rats[Title] OR mouse[Title] OR mice[Title])                                                                                 | 1258529 |
| 27 | Search (21 or 22 or 23 or 24 or 25 or 26)                                                                                                         | 5288319 |
| 28 | Search (20 not 27)                                                                                                                                | 10599   |
| 29 | Search ((randomized controlled trial[Publication Type]) OR randomized controlled trial[mh]) OR Randomized Controlled Trials as Topic[mh]          | 574111  |
| 30 | Search controlled clinical trial[Publication Type]                                                                                                | 550090  |
| 31 | Search (randomized[Title/Abstract]) OR randomised[Title/Abstract]                                                                                 | 531610  |
| 32 | Search placebo[Title/Abstract]                                                                                                                    | 194528  |
| 33 | Search randomly[Title/Abstract]                                                                                                                   | 292188  |
| 34 | Search trial[Title]                                                                                                                               | 182929  |
| 35 | Search (29 or 30 or 31 or 32 or 33 or 34)                                                                                                         | 1112114 |
| 36 | Search (29 and 36) Filters: Publication date to 2018/04/30                                                                                        | 3170    |

## Cochrane Library [Wiley]

| ID | Searches                               | Results |
|----|----------------------------------------|---------|
| #1 | [mh "drug eluting stents"]             | 1436    |
| #2 | (eluting near stent*):ti,ab,kw         | 3843    |
| #3 | (coronary near/3 angioplast*):ti,ab,kw | 5105    |

|     |                                                                                                                                    |        |
|-----|------------------------------------------------------------------------------------------------------------------------------------|--------|
| #4  | (coronary near/2 dilatation*):ti,ab,kw                                                                                             | 132    |
| #5  | coronary stent*:ti,ab,kw                                                                                                           | 6670   |
| #6  | [mh "Percutaneous Coronary Intervention"]                                                                                          | 5354   |
| #7  | (percutaneous coronary near/2 (interven* or revascular*)):ti,ab,kw                                                                 | 7725   |
| #8  | PCI:ti,ab,kw                                                                                                                       | 5473   |
| #9  | coronary artery atherectom*:ti,ab,kw                                                                                               | 168    |
| #10 | {or #1-#9}                                                                                                                         | 14692  |
| #11 | [mh "Platelet aggregation inhibitors"]                                                                                             | 3933   |
| #12 | [mh "Cyclooxygenase Inhibitors"] or [mh Thienopyridines] or [mh "Thromboxane A2"/AI] or [mh "Purinergic P2Y Receptor Antagonists"] | 3673   |
| #13 | antiplatelet* or anti-platelet* or antithrombocytic or "anti-thrombocytic":ti,ab,kw                                                | 5600   |
| #14 | "thromboxane A2" near/3 (inhib* or antag*):ti,ab,kw                                                                                | 144    |
| #15 | aspirin*:ti,ab,kw                                                                                                                  | 11039  |
| #16 | clopidogrel or ticagrelor or prasugrel:ti,ab,kw                                                                                    | 5162   |
| #17 | dual antiplatelet:ti,ab,kw                                                                                                         | 1247   |
| #18 | {or #11-#17}                                                                                                                       | 19250  |
| #19 | #10 and #18                                                                                                                        | 3904   |
| #20 | [mh animals] not [mh humans]                                                                                                       | 8283   |
| #21 | rat or rats or mouse or mice:ti,ab,kw                                                                                              | 6726   |
| #22 | #20 or #21                                                                                                                         | 13075  |
| #23 | #19 not #22                                                                                                                        | 3887   |
| #24 | randomized:ti,ab,kw                                                                                                                | 559663 |
| #25 | placebo:ti,ab,kw                                                                                                                   | 218670 |
| #26 | randomly:ti,ab,kw                                                                                                                  | 180301 |
| #27 | clinical trials:ti,ab,kw                                                                                                           | 123951 |
| #28 | {or #24-#27}                                                                                                                       | 758114 |
| #29 | #23 and #28                                                                                                                        | 2955   |

## Web of Science [Thompson Reuters]

| # | Searches                                | Results |
|---|-----------------------------------------|---------|
| 1 | TS=drug eluting stent                   | 22,108  |
| 2 | TS=(eluting near stent*)                | 30,804  |
| 3 | TS=(coronary near/3 angioplast*)        | 48,978  |
| 4 | TS=(coronary near/2 dilatation*)        | 1,263   |
| 5 | TS=coronary stent*                      | 61,101  |
| 6 | TS="Percutaneous Coronary Intervention" | 59,258  |

|    |                                                                                                                                                                                                                                         |           |
|----|-----------------------------------------------------------------------------------------------------------------------------------------------------------------------------------------------------------------------------------------|-----------|
| 7  | TS=(percutaneous coronary near/2 (interven* or revascular*))                                                                                                                                                                            | 69,347    |
| 8  | TS=PCI                                                                                                                                                                                                                                  | 41,299    |
| 9  | TS=coronary atherectom*                                                                                                                                                                                                                 | 4,237     |
| 10 | 9 OR 8 OR 7 OR 6 OR 5 OR 4 OR 3 OR 2 OR 1                                                                                                                                                                                               | 147,566   |
| 11 | TS="Platelet aggregation inhibitors"                                                                                                                                                                                                    | 33,244    |
| 12 | TS="thienopyridine derivative"                                                                                                                                                                                                          | 93        |
| 13 | TS=(antiplatelet* or anti-platelet* or antithrombocytic or anti-thrombocytic)                                                                                                                                                           | 42,642    |
| 14 | TS=(cyclooxygenase inhibitor* or thienopyridine*)                                                                                                                                                                                       | 54,678    |
| 15 | TS=(thromboxane A2 near/3 (inhib* or antag*))                                                                                                                                                                                           | 7,206     |
| 16 | TS=aspirin                                                                                                                                                                                                                              | 94,578    |
| 17 | TS=(clopidogrel or ticagrelor or prasugrel)                                                                                                                                                                                             | 25,484    |
| 18 | TS="dual antiplatelet**"                                                                                                                                                                                                                | 6,213     |
| 19 | 18 OR 17 OR 16 OR 15 OR 14 OR 13 OR 12 OR 11                                                                                                                                                                                            | 190,446   |
| 20 | 19 AND 10                                                                                                                                                                                                                               | 21,096    |
| 21 | TS= clinical trial* OR TS=research design OR TS=comparative stud* OR TS=evaluation stud* OR TS=controlled trial* OR TS=follow-up stud* OR TS=prospective stud* OR TS=random* OR TS=placebo* OR TS=(single blind*) OR TS=(double blind*) | 9,078,989 |
| 22 | 21 AND 20                                                                                                                                                                                                                               | 12,266    |
| 23 | 21 AND 20 limit clinical trials                                                                                                                                                                                                         | 2,396     |

## ClinicalTrials.gov

### Basic search

342 Studies found for: PCI OR Percutaneous Coronary Intervention OR drug eluting stent | Interventional Studies | Coronary Artery Disease | Antiplatelet Drug | Start date on or before 04/30/2018

## Clinicaltrialsregister.eu

### Basic search

43 Studies found for : antiplatelet AND PCI AND dateTo=2018-04-30
