# Supplementary material for: Duration of dual antiplatelet therapy after percutaneous coronary intervention with drug-eluting stent: systematic review and network meta-analysis
Source: PubMed Central journal article supplement — BMJ. 2019 Jun 27;365:l2222. doi: 10.1136/bmj.l2222 (PMC6595429; doi:10.1136/bmj.l2222), 2019-06-27
Supplement: yins048409.ww2.pdf [file yins048409.ww2.pdf]

# Appendix 2: Supplementary figures

## FigA -- Pair-wise meta analysis of all endpoints

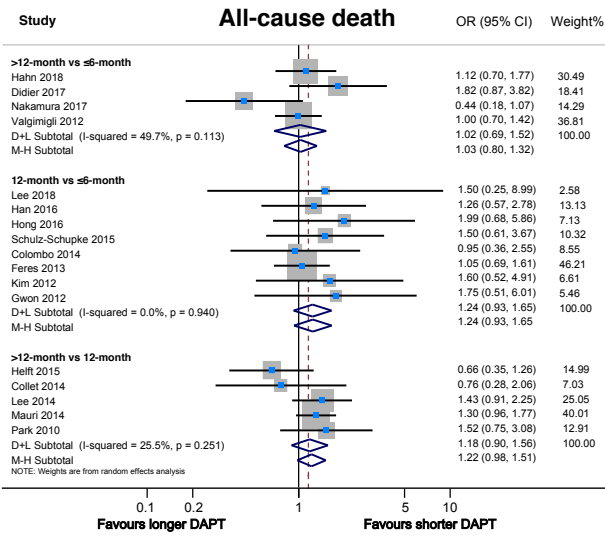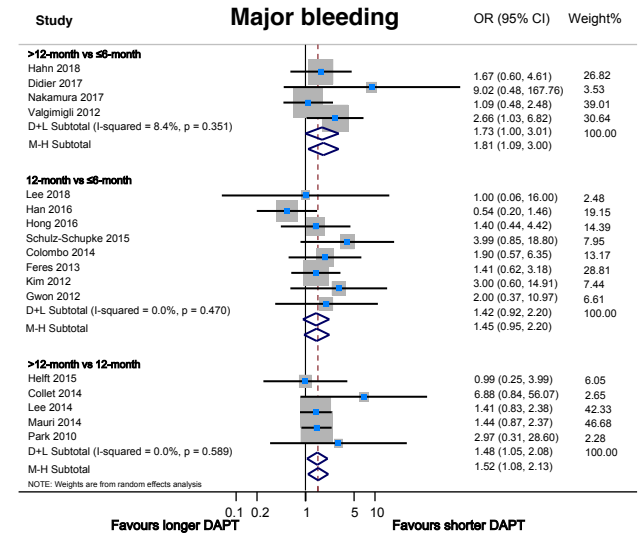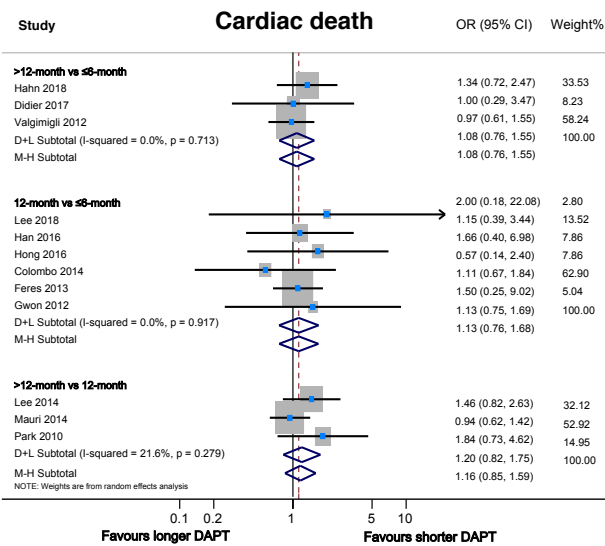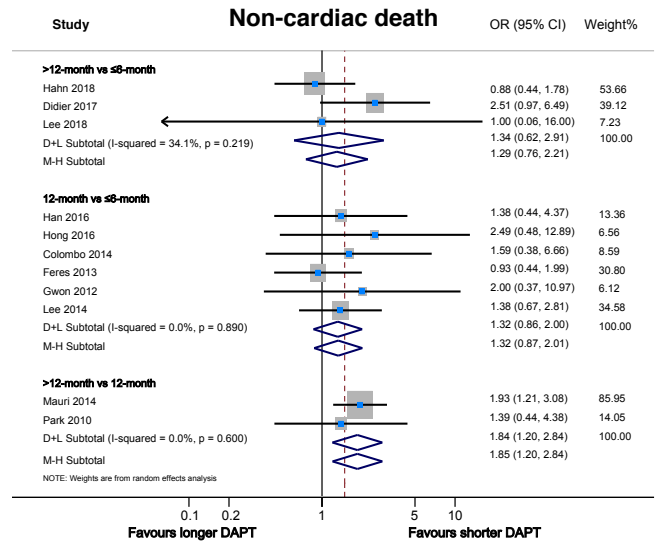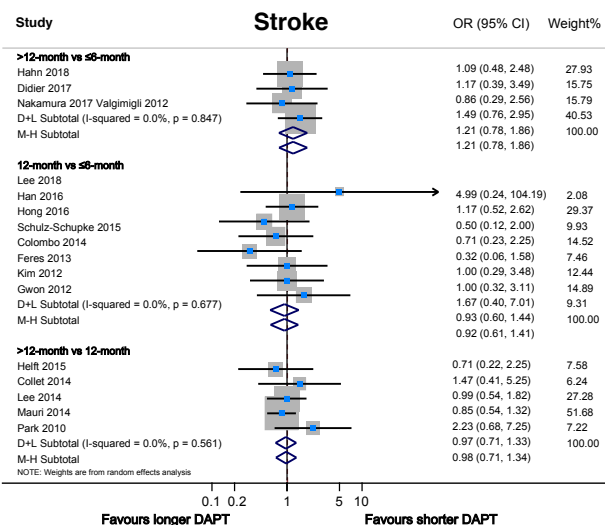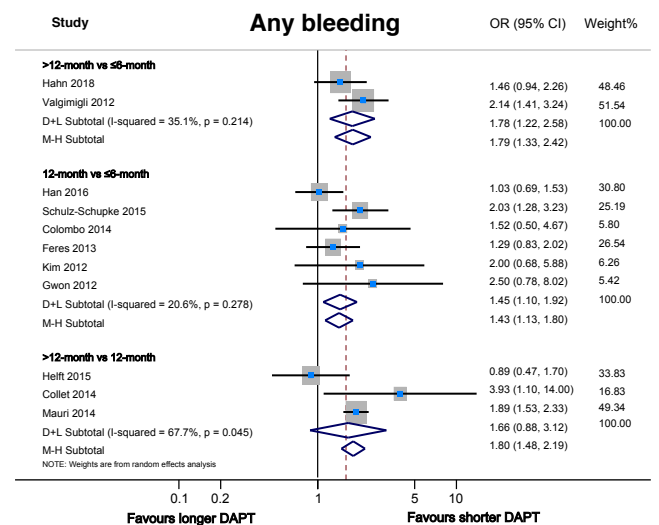

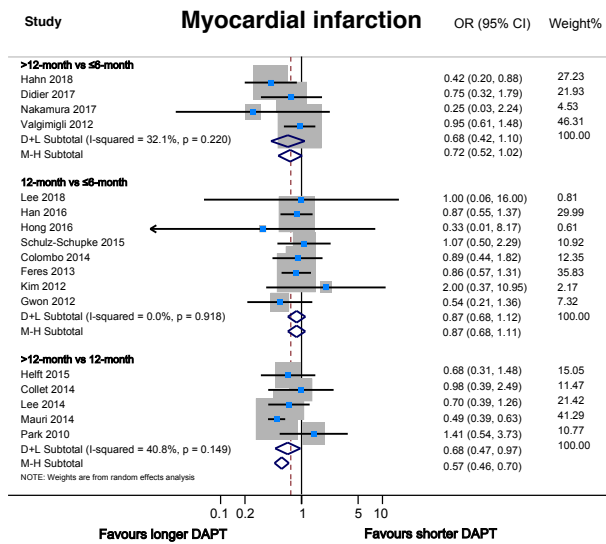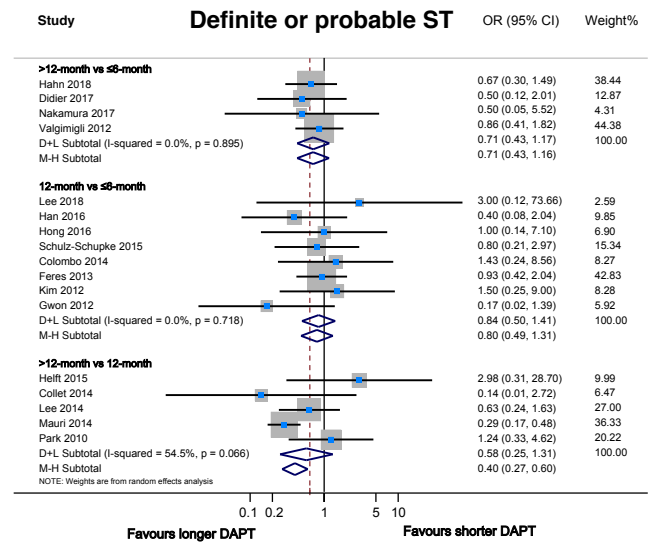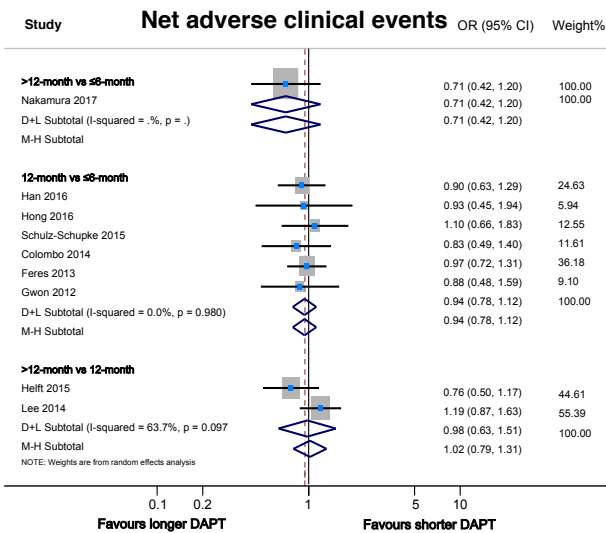

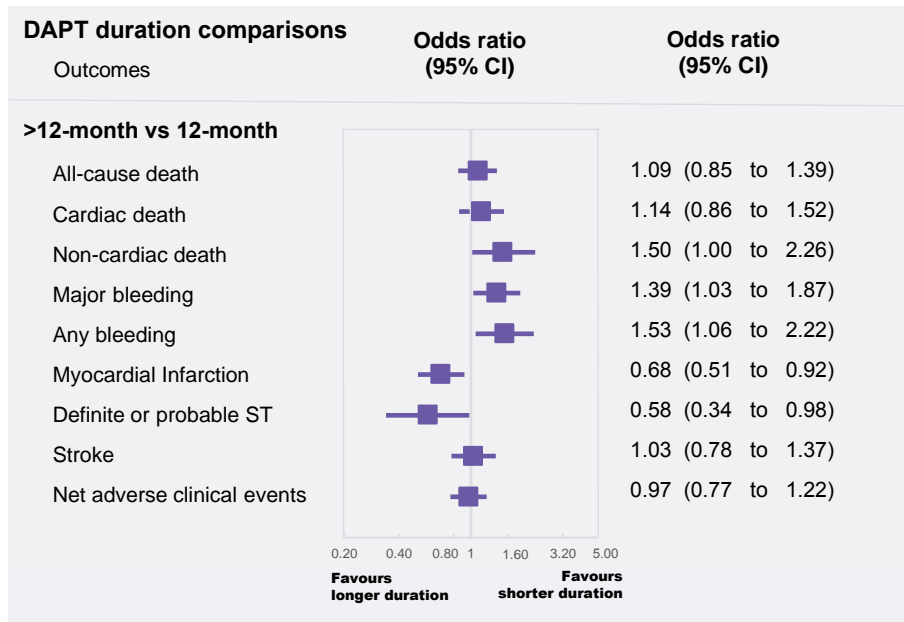

Fig B1 - Network meta-analysis results of all endpoints between >12-month and 12-month DAPT. The forest plot was based on the frequentist framework

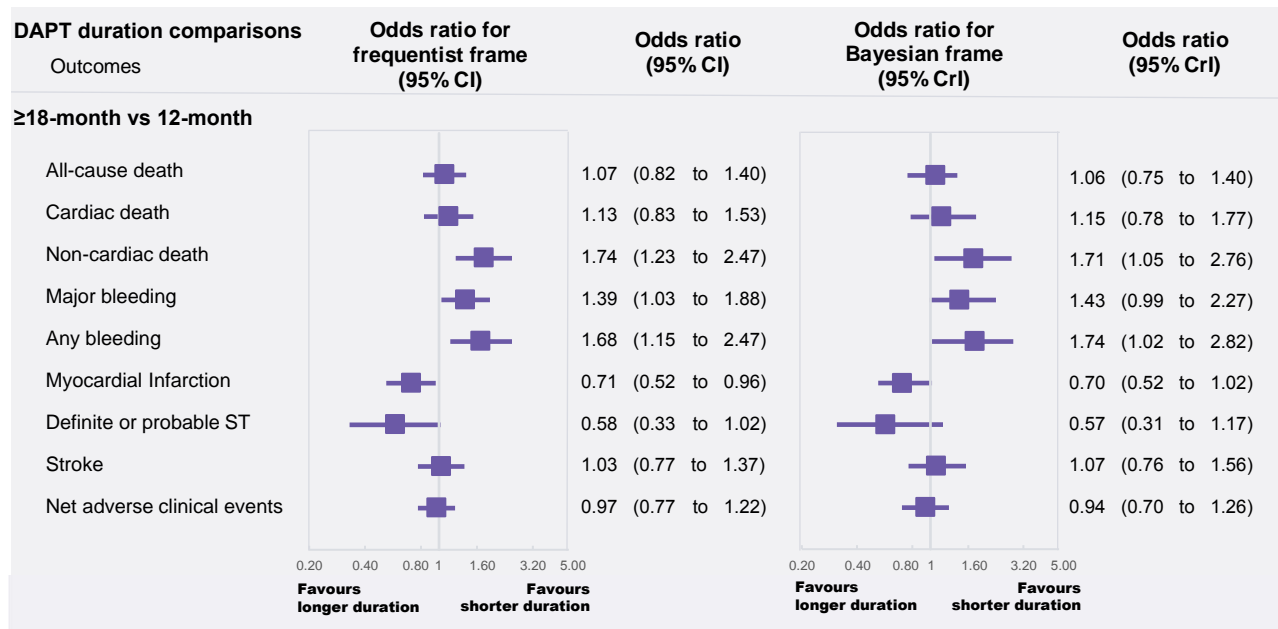

Fig B2 - Network meta-analysis results of all endpoints between ≥18-month and 12-month DAPT. The forest plot on the left was based on the frequentist framework, while that on the right was based on the Bayesian framework.

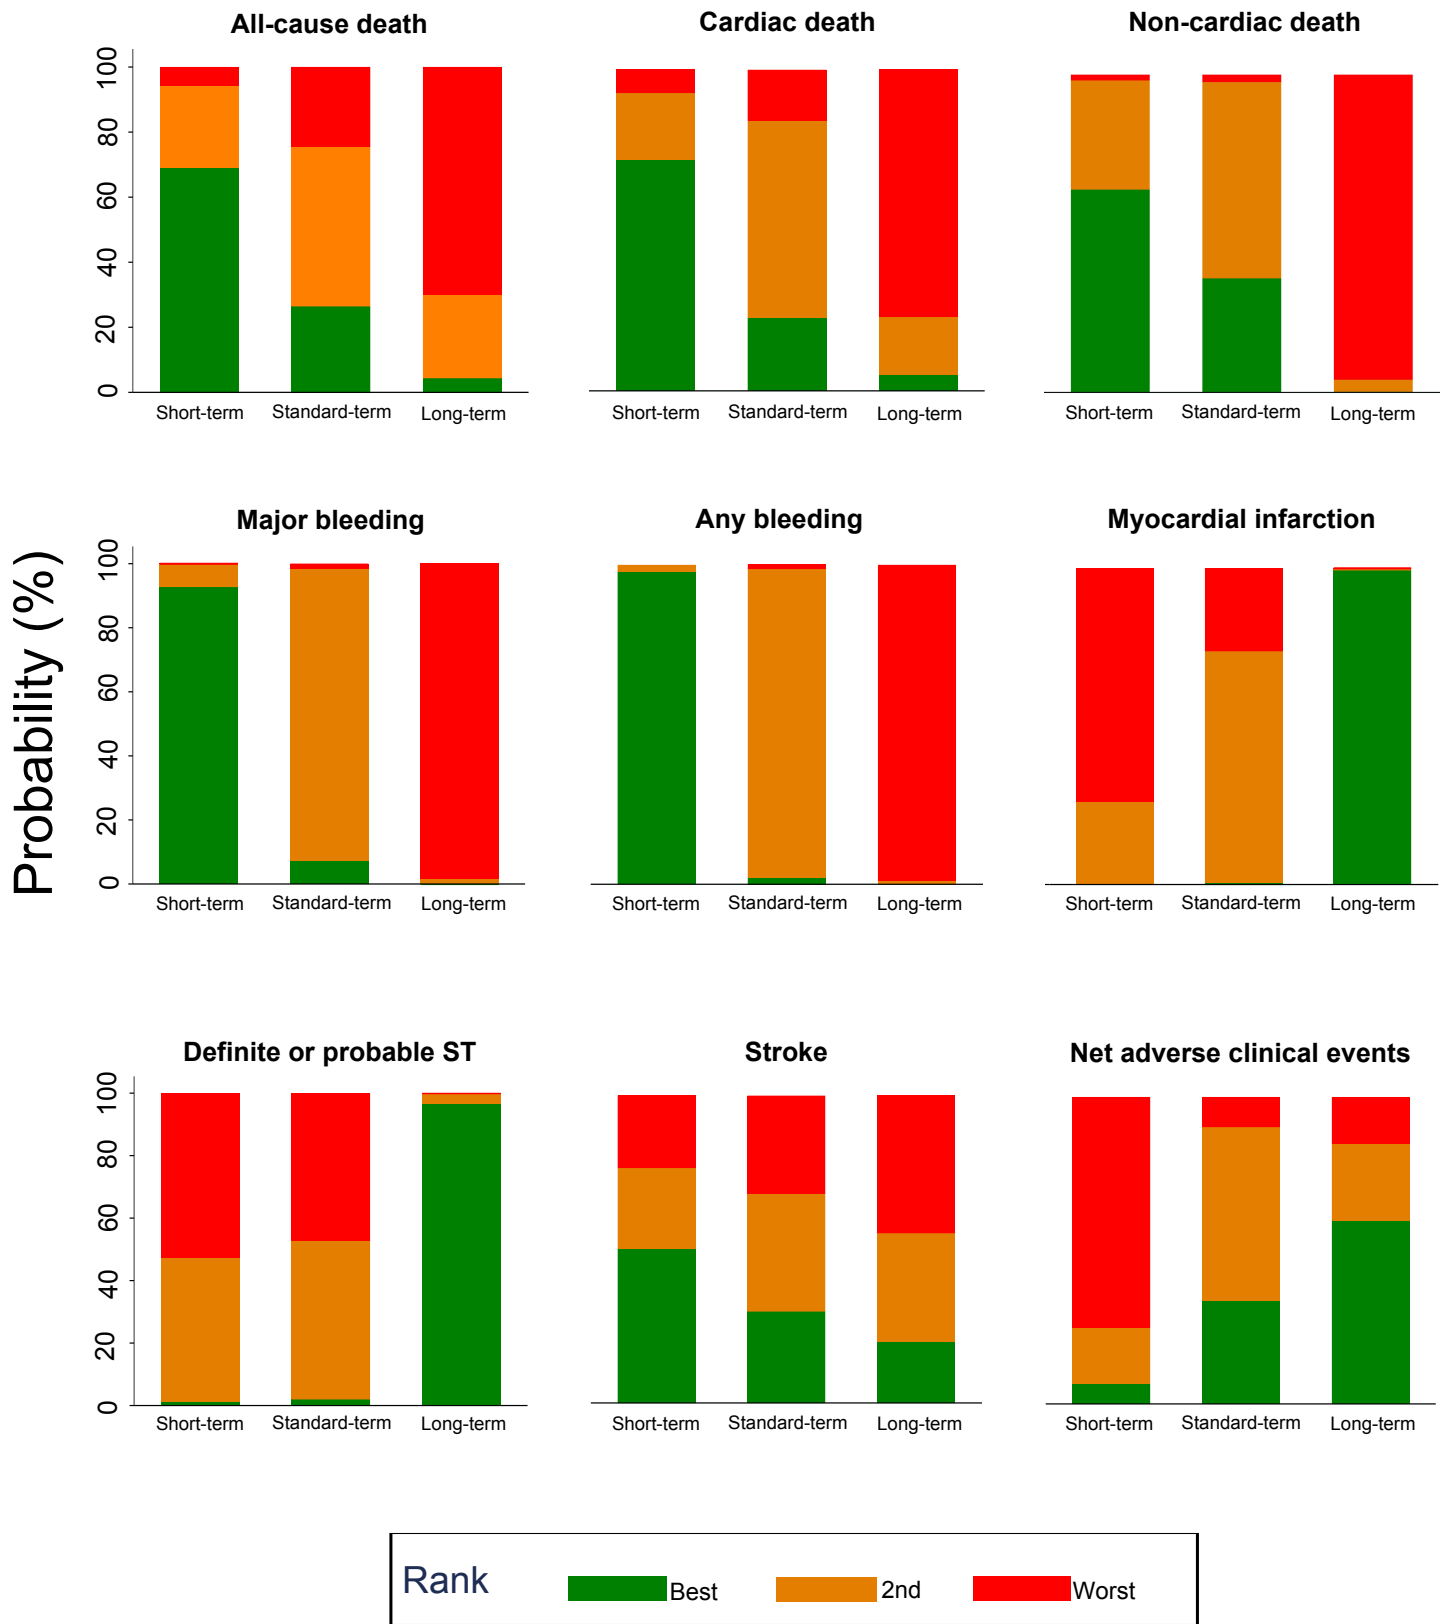

Fig C1- Rankograms demonstrating the probability of each therapy ranked at all endpoints. The long-term arm in this study group was >12-month DAPT

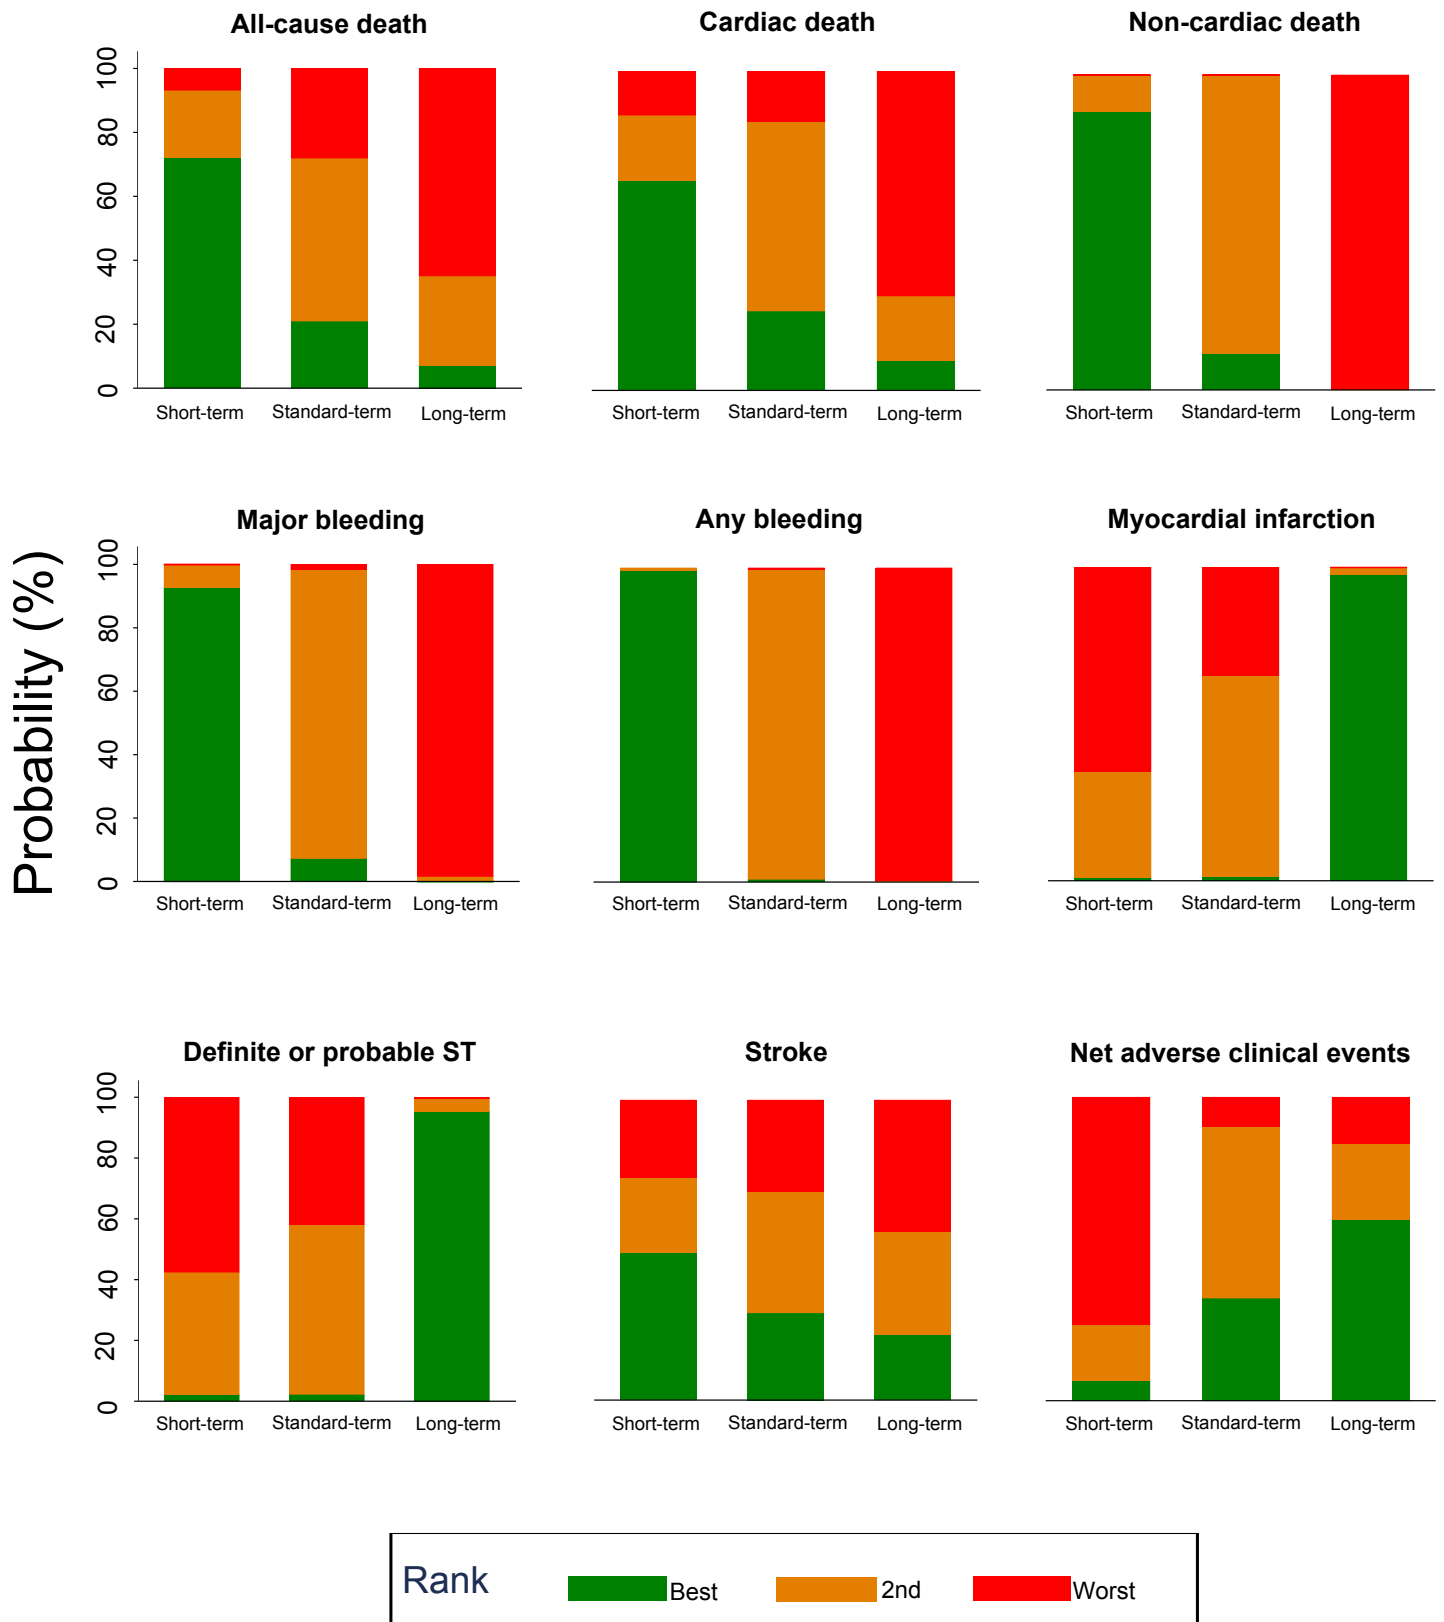

Fig C2- Rankograms demonstrating the probability of each therapy ranked at all endpoints. The long-term arm in this study group was  $\geq 18$ -month DAPT
