# Supplementary material for: Duration of dual antiplatelet therapy after percutaneous coronary intervention with drug-eluting stent: systematic review and network meta-analysis
Source: PubMed Central journal article supplement — BMJ. 2019 Jun 27;365:l2222. doi: 10.1136/bmj.l2222 (PMC6595429; doi:10.1136/bmj.l2222), 2019-06-27
Supplement: yins048409.ww3.pdf [file yins048409.ww3.pdf]

## Appendix 3: Supplementary tables

**Table A-Study characteristics**

The characteristics and quality assessment in terms of Cochrane risk of bias assessment of included RCTs

| <i>Trial</i>                               | <i>DAPT Group</i> | <i>DAPT Regimen</i>            | <i>Mean age, years</i> | <i>Male(%)</i> | <i>ACS(%)</i> | <i>Diabetes(%)</i> | <i>Time of randomization</i> | <i>Stent type</i>           | <i>Random sequence generation (selection bias)</i> | <i>Allocation concealment (selection bias)</i> | <i>Blinding of participants and personnel (performance bias)</i> | <i>Blinding of outcome assessment (detection bias)</i> | <i>Incomplete outcome data (attrition bias)</i> | <i>Selective reporting (reporting bias)</i> | <i>Other bias</i> |
|--------------------------------------------|-------------------|--------------------------------|------------------------|----------------|---------------|--------------------|------------------------------|-----------------------------|----------------------------------------------------|------------------------------------------------|------------------------------------------------------------------|--------------------------------------------------------|-------------------------------------------------|---------------------------------------------|-------------------|
| OPTIMA-C<br>NCT03056118, South Korea       | 6 months          | Aspirin (100mg/d) +            | 62.8                   | 478(70.0)      | 344(50.4)     | 199(29.1)          | At index PCI                 | BES/ZES                     | +                                                  | +                                              | +                                                                | +                                                      | +                                               | +                                           | ?                 |
|                                            | 12 months         | clopidogrel (75mg/d)           | 64.4                   | 464(67.8)      | 348(50.9)     | 203(29.7)          |                              |                             |                                                    |                                                |                                                                  |                                                        |                                                 |                                             |                   |
| I-LOVE-IT 2<br>NCT01681381, China          | 6 months          | Aspirin (100mg/d) +            | 60.4                   | 611(67.2)      | 752(82.7)     | 211(23.2)          | At index PCI                 | BP-SES                      | +                                                  | -                                              | ?                                                                | ?                                                      | +                                               | +                                           | -                 |
|                                            | 12 months         | clopidogrel (75mg/d)           | 60                     | 632(68.7)      | 744(80.9)     | 203(22.1)          |                              |                             |                                                    |                                                |                                                                  |                                                        |                                                 |                                             |                   |
| IVUS-XPL study<br>NCT01308281, South Korea | 6 months          | Aspirin (100mg/d) +            | 63                     | 470(67.2)      | 343(49.1)     | 249(35.6)          | At index PCI                 | EES                         | +                                                  | +                                              | ?                                                                | +                                                      | +                                               | ?                                           | -                 |
|                                            | 12 months         | clopidogrel (75mg/d)           | 64                     | 494(70.5)      | 343(48.9)     | 257(36.7)          |                              |                             |                                                    |                                                |                                                                  |                                                        |                                                 |                                             |                   |
| ISAR-SAFE<br>NCT00661206, worldwide        | 6 months          | Aspirin (81-200mg/d) +         | 67.2                   | 1661(83.2)     | 794(39.8)     | 495(24.8)          | 6(-1/+2)months<br>after PCI  | PES/SES/EES/<br>ZES/BES/BMS | +                                                  | +                                              | +                                                                | ?                                                      | +                                               | +                                           | ?                 |
|                                            | 12 months         | clopidogrel (75mg/d)           | 67.2                   | 1612(80.5)     | 807(40.3)     | 484(24.2)          |                              |                             |                                                    |                                                |                                                                  |                                                        |                                                 |                                             |                   |
| SECURITY<br>NCT00944333, worldwide         | 6 months          | Aspirin + clopidogrel (75mg/d) | 64.9                   | 529(77.6)      | 213(31.2)     | 206(30.2)          | At index PCI                 | ZES/BES/EES                 | +                                                  | +                                              | ?                                                                | ?                                                      | ?                                               | +                                           | -                 |
|                                            | 12 months         |                                | 65.5                   | 551(76.8)      | 229(31.9)     | 223(31.1)          |                              |                             |                                                    |                                                |                                                                  |                                                        |                                                 |                                             |                   |
| OPTIMIZE<br>NCT01113372, Brazil            | 3 months          | Aspirin (100-200mg/d) +        | 61.3                   | 992(64.5)      | 494(31.6)     | 554(35.4)          | At index PCI                 | ZES                         | +                                                  | +                                              | +                                                                | +                                                      | +                                               | +                                           | -                 |
|                                            | 12 months         | clopidogrel (75mg/d)           | 61.9                   | 982(63.1)      | 502(32.3)     | 549(35.3)          |                              |                             |                                                    |                                                |                                                                  |                                                        |                                                 |                                             |                   |
| EXCELLENT<br>NCT00698607, South Korea      | 6 months          | Aspirin (100-200mg/d) +        | 63                     | 470(65.1)      | 369(51.1)     | 272(37.7)          | At index PCI                 | EES/SES                     | +                                                  | +                                              | ?                                                                | -                                                      | +                                               | +                                           | ?                 |
|                                            | 12 months         | clopidogrel (75mg/d)           | 62.4                   | 461(63.9)      | 375(52.0)     | 278(38.6)          |                              |                             |                                                    |                                                |                                                                  |                                                        |                                                 |                                             |                   |



|                                                                       |                        |                                                 |              |                        |                        |                        |                        |                       |   |   |   |   |   |   |   |
|-----------------------------------------------------------------------|------------------------|-------------------------------------------------|--------------|------------------------|------------------------|------------------------|------------------------|-----------------------|---|---|---|---|---|---|---|
| REAL-ZEST LATE<br><small>NCT00484926+NCT00590174, South Korea</small> | 12 months<br>36 months | Aspirin (100-200mg/d) +<br>clopidogrel (75mg/d) | 61.9<br>62.0 | 933(69.4)<br>950(70.0) | 844(62.8)<br>843(62.1) | 364(27.1)<br>340(25.1) | 12 months after<br>PCI | SES/PES/ZES/<br>other | + | + | - | - | + | + | ? |
|-----------------------------------------------------------------------|------------------------|-------------------------------------------------|--------------|------------------------|------------------------|------------------------|------------------------|-----------------------|---|---|---|---|---|---|---|

**Table B1-Definition of clinical endpoints of the included RCTs**

| Trial                                            | Cardiac death                                                                                                                           | Myocardial infarction                                                                                                                                                                                                                                                                                                                                                                                                                                                                                                                                                                                                         | Definite or probable ST     | Stroke                                                                                                                                                                                                                                                                                           |
|--------------------------------------------------|-----------------------------------------------------------------------------------------------------------------------------------------|-------------------------------------------------------------------------------------------------------------------------------------------------------------------------------------------------------------------------------------------------------------------------------------------------------------------------------------------------------------------------------------------------------------------------------------------------------------------------------------------------------------------------------------------------------------------------------------------------------------------------------|-----------------------------|--------------------------------------------------------------------------------------------------------------------------------------------------------------------------------------------------------------------------------------------------------------------------------------------------|
| OPTIMA-C<br>(Lee <i>et al.</i> 2018)             | ARC criteria <sup>1</sup> .                                                                                                             | ARC criteria <sup>1</sup> .                                                                                                                                                                                                                                                                                                                                                                                                                                                                                                                                                                                                   | ARC criteria <sup>1</sup> . | ARC criteria <sup>1</sup> .                                                                                                                                                                                                                                                                      |
| I-LOVE-IT 2<br>(Han <i>et al.</i> 2016)          | Any death due to an evident cardiac cause, any death related to PCI, unwitnessed death, or death of unknown causes <sup>2</sup> .       | ARC criteria <sup>2</sup> .                                                                                                                                                                                                                                                                                                                                                                                                                                                                                                                                                                                                   | NA                          | NA                                                                                                                                                                                                                                                                                               |
| IVUS-XPL study<br>(Hong <i>et al.</i> 2016)      | All deaths were considered cardiac deaths unless a definite noncardiac cause could be established <sup>3</sup> .                        | The presence of consistent clinical symptoms, ECG changes, or abnormal imaging findings, combined with a creatine kinase myocardial band fraction increase greater than ULN or an increase in troponin T or troponin I to >99 <sup>th</sup> percentile of the ULN <sup>3</sup> .                                                                                                                                                                                                                                                                                                                                              | ARC criteria <sup>3</sup> . | Detected by the occurrence of a new neurological deficit, was confirmed using a neurological examination and imaging studies <sup>3</sup> .                                                                                                                                                      |
| ISAR-SAFE<br>(Schulz-Schupke <i>et al.</i> 2015) |                                                                                                                                         | New Q-waves on the electrocardiography(ECG) distinct from the baseline ECG, pathologic evidence(such as autopsy) showing a new myocardial infarction(MI) felt to have occurred during study follow-up, ST-segment elevation (>1 mm in 2 contiguous leads) accompanied by ischemic chest pain lasting for >20minutes or hemodynamic decompensation(online Appendix) <sup>4</sup> .                                                                                                                                                                                                                                             | ARC criteria <sup>5</sup> . | Acute neurological event of at least 24 hours of duration, with focal signs and symptoms and without evidence supporting any alternative explanation. Diagnosis of stroke requires confirmation by computed tomography or magnetic resonance imaging or pathological confirmation <sup>4</sup> . |
| SECURITY<br>(Colombo <i>et al.</i> 2014)         | Including any death without a non-cardiac cause <sup>6</sup> .                                                                          | Cardiac enzyme elevation (troponin T/I or creatine kinase-myocardial band) above the ULN associated with at least 1 ischemic symptom; development of Q waves on the ECG; ECG changes indicative of ischemia or coronary artery intervention <sup>6</sup> .                                                                                                                                                                                                                                                                                                                                                                    | ARC criteria <sup>6</sup> . | Any new neurological deficit lasting >24 h associated with neuroimaging evidence (computed tomography or magnetic resonance imaging) <sup>6</sup> .                                                                                                                                              |
| OPTIMIZE<br>(Feres <i>et al.</i> 2013)           | Any unknown causes of death or death that cannot be clearly attributed to a non-cardiac cause will be considered cardiac <sup>7</sup> . | Classified as Q wave (new pathological Q waves in 2 or more continuous ECG leads) or non-Q wave, and: Periprocedural—within 48 hours post-PCI with baseline biomarker <ULN (upper limit of normal), rise in CKMB or troponin >3 times ULN. (For CABG related: baseline biomarker <ULN, rise in CKMB or troponin >5 times ULN, and new Q wave/LBBB or new native or graft vessel occlusion or loss of viable myocardium); Spontaneous—CK-MB or troponin >ULN; Re-infarction—stable or decreasing biomarker values on 2 samples and >20% increase 3 to 6 hours post-intervention as compared to baseline samples <sup>7</sup> . | ARC criteria <sup>7</sup> . | Acute neurological event with duration $\geq$ 24 hours with confirmation by either computed tomography or magnetic resonance imaging or pathological confirmation <sup>7</sup> .                                                                                                                 |
| EXCELLENT<br>(Gwon <i>et al.</i> 2012)           | All deaths were considered cardiac unless a definite noncardiac cause                                                                   | During the first 48 hours after PCI, defined as an increase of cardiac enzyme (creatine kinase-MB fraction or troponin T/troponin I) 3 times above the ULN in                                                                                                                                                                                                                                                                                                                                                                                                                                                                 | ARC criteria <sup>8</sup> . | Detected by the occurrence of a new neurological deficit, was confirmed by a neurologist and on                                                                                                                                                                                                  |

|                                            |                                                                                                             |                                                                                                                                                                                                                                                                                                                                                                                                                                                                                                                                                                                                                                                                                                                                                                                                                                                                                                                                       |                              |                                                                                                                                                                                                                                                                                                                                                                                                         |
|--------------------------------------------|-------------------------------------------------------------------------------------------------------------|---------------------------------------------------------------------------------------------------------------------------------------------------------------------------------------------------------------------------------------------------------------------------------------------------------------------------------------------------------------------------------------------------------------------------------------------------------------------------------------------------------------------------------------------------------------------------------------------------------------------------------------------------------------------------------------------------------------------------------------------------------------------------------------------------------------------------------------------------------------------------------------------------------------------------------------|------------------------------|---------------------------------------------------------------------------------------------------------------------------------------------------------------------------------------------------------------------------------------------------------------------------------------------------------------------------------------------------------------------------------------------------------|
|                                            | could be established <sup>8</sup> .                                                                         | stable patients; In patients with elevated baseline levels of cardiac enzyme, myocardial infarction was defined as a subsequent increase of >2-fold from baseline values; After the first 48hours, myocardial infarction was defined as the presence of clinical signs of MI combined with a creatine kinase-MB fraction or troponin T/troponin I increase higher than ULN <sup>8</sup> .                                                                                                                                                                                                                                                                                                                                                                                                                                                                                                                                             |                              | Imaging <sup>8</sup> .                                                                                                                                                                                                                                                                                                                                                                                  |
| RESET<br>(Kim <i>et al.</i> 2012)          |                                                                                                             | Presence of clinical symptoms, ECG change or abnormal imaging findings of MI combined with an increase in creatine kinase myocardial band fraction to greater than three times the ULN or troponin-T/troponin-I more than the 99th percentile of the ULN, unrelated to an interventional procedure (online Appendix) <sup>9</sup> .                                                                                                                                                                                                                                                                                                                                                                                                                                                                                                                                                                                                   | ARC criteria <sup>9</sup> .  | A sudden onset of vertigo, numbness, aphasia, or dysarthria resulting from vascular lesions of the brain, including hemorrhage, embolism, thrombosis, or rupturing aneurysm(online Appendix) <sup>9</sup> .                                                                                                                                                                                             |
| SMART-DATE<br>(Hahn <i>et al.</i> 2018)    | All deaths were considered cardiac unless a definite non-cardiac cause could be established <sup>10</sup> . | Elevated cardiac enzymes (cardiac troponin or myocardial band fraction of creatine kinase) above the upper reference limit with ischaemic symptoms or electrocardiography findings indicative of ischaemia that was not related to the index procedure <sup>10</sup> .                                                                                                                                                                                                                                                                                                                                                                                                                                                                                                                                                                                                                                                                | ARC criteria <sup>10</sup> . | any non-convulsive focal or global neurological deficit of abrupt onset lasting more than 24 h or leading to death, which was caused by ischaemia or haemorrhage within the brain <sup>10</sup> .                                                                                                                                                                                                       |
| NIPPON<br>(Nakamura <i>et al.</i> 2017)    |                                                                                                             | 1.Periprocedural: A serum CK-MB level exceeding the ULN should not be considered as new MI, but as MI at registration;, a serum troponin or serum CK-MB level exceeding 3 times the ULN within 48 hours after PCI; a serum troponin or serum CK-MB level exceeding 5 times the ULN within 72 hours after CABG; and a new Q-wave, left bundle block, new occlusion of the native vessel or graft, or reduction of viable myocardium on diagnostic imaging.<br>2.Spontaneous: When myocardial enzymes are at or above the ULN, it should be considered as MI at registration, and when the serum level of troponin or CK-MB exceeds ULN more than 48 hours after PCI or within 72 hours after CABG.<br>3.Re-infarction: Blood levels of biomarkers measured twice after the onset of MI are stable or decrease and the values at 3 to 6 hours after PCI show a > 20% increase compared with those obtained at index PCI <sup>11</sup> . | ARC criteria <sup>11</sup> . | Occurrence of cerebral infarction (ischemic stroke) or cerebral hemorrhage or subarachnoid hemorrhage (hemorrhagic stroke). Stroke was defined as the sudden onset of vertigo, numbness, dysphasia, weakness, visual field defects, dysarthria or other focal neurological deficits due to vascular lesions of the brain such as hemorrhage, embolism, thrombosis, or ruptured aneurysm <sup>11</sup> . |
| ITALIC<br>(Didier <i>et al.</i> 2017)      | All deaths unless an unequivocal non-cardiac cause could be established <sup>12</sup> .                     | Q-wave MI was defined by recurrence of symptoms and/or development of new pathological Q waves in 2 or more contiguous leads with elevated creatine kinase (CK), CK-MB, or troponin levels.; Non-Q-wave MI was defined by >2-fold CK elevation with elevated CK-MB or troponin without new pathological Q waves <sup>12</sup> .                                                                                                                                                                                                                                                                                                                                                                                                                                                                                                                                                                                                       | ARC criteria <sup>12</sup> . | Acute new neurological deficit ending in death or lasting longer than 24 h, diagnosed as stroke by a physician <sup>12</sup> .                                                                                                                                                                                                                                                                          |
| PRODIGY<br>(Valgimigli <i>et al.</i> 2012) |                                                                                                             | New pathologic Q waves or CK-MB or troponin I/T elevation above the upper limit of normal, accompanied by ischemic symptoms and/or ECG changes <sup>13</sup> .                                                                                                                                                                                                                                                                                                                                                                                                                                                                                                                                                                                                                                                                                                                                                                        | ARC criteria <sup>14</sup> . | Detected by the occurrence of a new neurological deficit, was confirmed by a neurologist and on imaging, whereas the occurrence of a transient ischemic attack required hospitalization and clinical confirmation by a neurologist <sup>14</sup> .                                                                                                                                                      |
| OPTIDUAL<br>(Helft <i>et al.</i> 2015)     |                                                                                                             | Presence of clinical or ECG changes consistent with myocardial ischaemia in the setting of increased cardiac biomarkers above ULN in accordance with the                                                                                                                                                                                                                                                                                                                                                                                                                                                                                                                                                                                                                                                                                                                                                                              | ARC criteria <sup>15</sup> . | Acute episode of neurologic dysfunction attributed to a central nervous system vascular cause. Stroke                                                                                                                                                                                                                                                                                                   |

|                                                    |                                                                                                                                             |                                                                                                                                                                                                                                                                                                                                                                                                                                                                                                                                                                                                                                                                                                                                  |                                                                                                                                                                                                                   |                               |                                                                                                                                                                                                                                                                                                                                                                                                                                                                                                                                                                                                                                                                                                                                                                                                                 |
|----------------------------------------------------|---------------------------------------------------------------------------------------------------------------------------------------------|----------------------------------------------------------------------------------------------------------------------------------------------------------------------------------------------------------------------------------------------------------------------------------------------------------------------------------------------------------------------------------------------------------------------------------------------------------------------------------------------------------------------------------------------------------------------------------------------------------------------------------------------------------------------------------------------------------------------------------|-------------------------------------------------------------------------------------------------------------------------------------------------------------------------------------------------------------------|-------------------------------|-----------------------------------------------------------------------------------------------------------------------------------------------------------------------------------------------------------------------------------------------------------------------------------------------------------------------------------------------------------------------------------------------------------------------------------------------------------------------------------------------------------------------------------------------------------------------------------------------------------------------------------------------------------------------------------------------------------------------------------------------------------------------------------------------------------------|
| DAPT Study<br>(Mauri <i>et al.</i> 2014)           | Any death due to immediate cardiac cause. Unwitnessed death and death of unknown cause will be classified as cardiac death <sup>16</sup> .  | universal definition(details were provided in online appendix) <sup>15</sup> .                                                                                                                                                                                                                                                                                                                                                                                                                                                                                                                                                                                                                                                   | The categories includes peri-procedural PCI, peri-procedural CABG, spontaneous, silent, sudden death, and reinfarction, more details were provided in the online appendix of the original article <sup>16</sup> . | ARC criteria <sup>16</sup> .  | should be documented by imaging. Evidence obtained from autopsy can confirm the diagnosis <sup>15</sup> . Sudden onset of vertigo, numbness, dysphasia, weakness, visual field defects, dysarthria or other focal neurological deficits due to vascular lesions of the brain such as hemorrhage, embolism, thrombosis, or rupturing aneurysm that either:<br>1. persists more than 24 hours or results in death in less than 24 hours; 2. persists <24 hours duration if the following treatments were used:<br>a. pharmacologic, i.e. thrombolytic drug administration, or<br>b. non-pharmacologic, i.e. neuro- interventional procedure (e.g. intracranial angioplasty);<br>3. persists <24 hours but has neuro-radiological (MRI or CT) diagnostic changes suggestive of acute tissue injury <sup>16</sup> . |
| DES LATE<br>(Lee <i>et al.</i> 2014)               | All deaths were considered to have resulted from cardiac causes unless an unequivocal noncardiac cause could be established <sup>17</sup> . | ARC criteria <sup>17</sup> .                                                                                                                                                                                                                                                                                                                                                                                                                                                                                                                                                                                                                                                                                                     |                                                                                                                                                                                                                   | ARC criteria* <sup>17</sup> . | Detected by the occurrence of a new neurological deficit, was confirmed by a neurologist and imaging <sup>17</sup> .                                                                                                                                                                                                                                                                                                                                                                                                                                                                                                                                                                                                                                                                                            |
| ARCTIC-Interruption<br>(Collet <i>et al.</i> 2014) |                                                                                                                                             | (i) In patients with elevated biomarkers before PCI, positive diagnosis of reinfarction is made when all of the following criteria are present: documentation that troponin level (or CK in the absence of CPK-MB) was decreasing; (2) troponin (or CPK-MB) measured 6 hours after PCI is N3×ULN; (3) peak troponin (or CPK-MB) level measured within 24 hours after the event is elevated by at least 50% above the previous level. (ii) In patients in whom biomarkers are normal or have returned to normal prior to PCI, periprocedural MI is defined when troponin (or CPKMB) measured 6 hours after PCI is N3× ULN. Measurements of biomarkers are requested before and 6 hours after PCI and at discharge <sup>18</sup> . | Universal definition of myocardial infarction <sup>19 20</sup> .                                                                                                                                                  | ARC criteria* <sup>18</sup> . | NA                                                                                                                                                                                                                                                                                                                                                                                                                                                                                                                                                                                                                                                                                                                                                                                                              |
| REAL-ZEST LATE<br>(Park <i>et al.</i> 2010)        | All deaths were considered to be from cardiac causes unless an unequivocal noncardiac cause could be established <sup>19</sup> .            |                                                                                                                                                                                                                                                                                                                                                                                                                                                                                                                                                                                                                                                                                                                                  | Universal definition of myocardial infarction <sup>19 20</sup> .                                                                                                                                                  | ARC criteria* <sup>19</sup> . | Detected by the occurrence of a new neurologic deficit, was confirmed by a neurologist and on imaging <sup>19</sup> .                                                                                                                                                                                                                                                                                                                                                                                                                                                                                                                                                                                                                                                                                           |

\*Definite stent thrombosis only.

NA refers to that though the endpoint was listed in the paper, the concrete definition was not available.

The blank represented no results were provided in original articles or the definition of the result might incur unacceptable bias.

**Table B2-Definition of clinical endpoints of the included RCTs**

| Trial                                            | Major bleeding                                                                                     | Any bleeding                                                                                                                                                                                                               | Net adverse clinical events                                                                           |
|--------------------------------------------------|----------------------------------------------------------------------------------------------------|----------------------------------------------------------------------------------------------------------------------------------------------------------------------------------------------------------------------------|-------------------------------------------------------------------------------------------------------|
| OPTIMA-C<br>(Lee <i>et al.</i> 2018)             | TIMI major bleeding                                                                                |                                                                                                                                                                                                                            |                                                                                                       |
| I-LOVE-IT 2<br>(Han <i>et al.</i> 2016)          | BARC type $\geq$ 3 bleeding.                                                                       | BARC criteria.                                                                                                                                                                                                             | A composite of all-cause death, all MI, stroke and BARC type $\geq$ 3 bleeding.                       |
| IVUS-XPL study<br>(Hong <i>et al.</i> 2016)      | TIMI Major bleeding.                                                                               |                                                                                                                                                                                                                            | A composite of cardiac death, myocardial infarction, stroke, or TIMI major bleeding.                  |
| ISAR-SAFE<br>(Schulz-Schupke <i>et al.</i> 2015) | TIMI major bleeding.                                                                               | BARC criteria.                                                                                                                                                                                                             | A composite of death, MI ,stent thrombosis(ST), stroke or TIMI major bleeding                         |
| SECURITY<br>(Colombo <i>et al.</i> 2014)         | BARC 3 or 5 type bleeding.                                                                         | BARC criteria.                                                                                                                                                                                                             | A composite of cardiac death, MI, stroke, definite or probable ST, and BARC 3 or 5 bleeding.          |
| OPTIMIZE<br>(Feres <i>et al.</i> 2013)           | Incorporated modified major REPLACE-2 and severe or life-threatening GUSTO criteria <sup>7</sup> . | Major bleeding plus bleeding events that did not meet criteria for either major or severe or life-threatening bleeding according to modified major REPLACE-2 and severe or life- threatening GUSTO criteria <sup>7</sup> . | A composite of death, myocardial infarction, stroke and major bleeding.                               |
| EXCELLENT<br>(Gwon <i>et al.</i> 2012)           | TIMI Major bleeding.                                                                               | TIMI criteria.                                                                                                                                                                                                             | A composite of death, MI, stroke, ST, and TIMI major bleeding.                                        |
| RESET<br>(Kim <i>et al.</i> 2012)                | TIMI Major bleeding.                                                                               | TIMI criteria.                                                                                                                                                                                                             |                                                                                                       |
| SMART-DATE<br>(Hahn <i>et al.</i> 2018)          | BARC type 3-5 bleeding.                                                                            | BARC type 2–5 bleeding.                                                                                                                                                                                                    |                                                                                                       |
| NIPPON<br>(Nakamura <i>et al.</i> 2017)          | BARC 3 or 5 type bleeding.                                                                         |                                                                                                                                                                                                                            | A composite of all-cause mortality, myocardial infarction, stroke, and REPLACE-2 major bleeding.      |
| ITALIC<br>(Didier <i>et al.</i> 2017)            | TIMI Major bleeding.                                                                               |                                                                                                                                                                                                                            |                                                                                                       |
| PRODIGY<br>(Valgimigli <i>et al.</i> 2012)       | TIMI Major bleeding.                                                                               | BARC criteria.                                                                                                                                                                                                             |                                                                                                       |
| OPTIDUAL<br>(Helft <i>et al.</i> 2015)           | TIMI major bleeding.                                                                               | BARC criteria.                                                                                                                                                                                                             | A composite of all-cause mortality, non-fatal myocardial infarction, stroke, and TIMI major bleeding. |
| DAPT Study<br>(Mauri <i>et al.</i> 2014)         | GUSTO severe bleeding.                                                                             | BARC criteria.                                                                                                                                                                                                             |                                                                                                       |

|                                                    |                         |                   |                                                                                                        |
|----------------------------------------------------|-------------------------|-------------------|--------------------------------------------------------------------------------------------------------|
| DES LATE<br>(Lee <i>et al.</i> 2014)               | TIMI Major bleeding.    |                   | A composite of cardiac death, myocardial infarction, stroke, stent thrombosis and TIMI major bleeding. |
| ARCTIC-Interruption<br>(Collet <i>et al.</i> 2014) | STEEPLE major bleeding. | STEEPLE criteria. |                                                                                                        |
| REAL-ZEST LATE<br>(Park <i>et al.</i> 2010)        | TIMI Major bleeding.    |                   |                                                                                                        |

GUSTO refers to The Global Use of Strategies to Open Occluded Arteries; ARC refers to Academic Research Consortium; STEEPL refers to Enoxaparin versus Unfractionated Heparin in Elective Percutaneous Coronary Intervention; REPLACE refers to Randomized Evaluation of PCI Linking Angiomax to Reduced Clinical Events; TIMI refers to thrombolysis in Myocardial Infarction; BARC refers to Bleeding Academic Research Consortium.

NA refers to that though the endpoint was listed in the paper, the concrete definition was not available.

The blank represented no results were provided in original articles or the definition of the result might incur unacceptable bias.



**Table C1-Assessment of heterogeneity and consistency, for all endpoints in the study group with long-term arm as >12 months DAPT**

| Endpoints                   | Comparison                  | Direct |      |      | indirect |      |      | Network |      |      | Heterogeneity  | Consistency             |           |
|-----------------------------|-----------------------------|--------|------|------|----------|------|------|---------|------|------|----------------|-------------------------|-----------|
|                             |                             | OR     | LL   | UL   | OR       | LL   | UL   | OR      | LL   | UL   | I <sup>2</sup> | Global P>X <sup>2</sup> | Local P>z |
| All-cause death             | Long-term vs Short-term     | 1.04   | 0.80 | 1.33 | 1.51     | 1.05 | 2.17 | 1.18    | 0.93 | 1.49 | 0              | 0.092                   | 0.094     |
|                             | Standard-term vs Short-term | 1.24   | 0.93 | 1.65 | 0.85     | 0.61 | 1.18 | 1.08    | 0.82 | 1.43 | 0              |                         |           |
|                             | Long-term vs Standard-term  | 1.22   | 0.98 | 1.52 | 0.84     | 0.57 | 1.23 | 1.09    | 0.85 | 1.39 | 0              |                         |           |
| Cardiac death               | Long-term vs Short-term     | 1.27   | 0.73 | 2.20 | 1.29     | 0.78 | 2.16 | 1.28    | 0.88 | 1.86 | 0              | 0.956                   | 0.955     |
|                             | Standard-term vs Short-term | 1.13   | 0.75 | 1.69 | 1.11     | 0.59 | 2.09 | 1.12    | 0.80 | 1.58 | 0              |                         |           |
|                             | Long-term vs Standard-term  | 1.15   | 0.84 | 1.57 | 1.12     | 0.57 | 2.22 | 1.14    | 0.86 | 1.52 | 0              |                         |           |
| Non-cardiac death           | Long-term vs Short-term     | 1.28   | 0.71 | 2.30 | 2.18     | 1.16 | 4.11 | 1.63    | 1.03 | 2.59 | 0.018          | 0.226                   | 0.185     |
|                             | Standard-term vs Short-term | 1.28   | 0.75 | 2.17 | 0.75     | 0.35 | 1.59 | 1.09    | 0.67 | 1.77 | 0.018          |                         |           |
|                             | Long-term vs Standard-term  | 1.71   | 1.14 | 2.57 | 1.00     | 0.47 | 2.14 | 1.50    | 1.00 | 2.26 | 0.019          |                         |           |
| Major bleeding              | Long-term vs Short-term     | 1.62   | 1.06 | 2.46 | 2.11     | 1.21 | 3.67 | 1.78    | 1.27 | 2.49 | 0              | 0.458                   | 0.600     |
|                             | Standard-term vs Short-term | 1.42   | 0.92 | 2.20 | 1.09     | 0.64 | 1.88 | 1.28    | 0.91 | 1.80 | 0              |                         |           |
|                             | Long-term vs Standard-term  | 1.48   | 1.05 | 2.09 | 1.14     | 0.62 | 2.09 | 1.39    | 1.03 | 1.87 | 0              |                         |           |
| Any bleeding                | Long-term vs Short-term     | 1.82   | 1.10 | 3.01 | 2.64     | 1.47 | 4.77 | 2.13    | 1.46 | 3.10 | 0.290          | 0.346                   | 0.390     |
|                             | Standard-term vs Short-term | 1.51   | 1.05 | 2.18 | 1.04     | 0.52 | 2.07 | 1.39    | 1.01 | 1.92 | 0.290          |                         |           |
|                             | Long-term vs Standard-term  | 1.75   | 1.10 | 2.80 | 1.21     | 0.65 | 2.25 | 1.53    | 1.06 | 2.22 | 0.290          |                         |           |
| Myocardial infarction       | Long-term vs Short-term     | 0.70   | 0.46 | 1.07 | 0.55     | 0.34 | 0.88 | 0.63    | 0.46 | 0.86 | 0.173          | 0.464                   | 0.113     |
|                             | Standard-term vs Short-term | 0.87   | 0.64 | 1.17 | 1.12     | 0.61 | 2.04 | 0.92    | 0.70 | 1.21 | 0.173          |                         |           |
|                             | Long-term vs Standard-term  | 0.63   | 0.43 | 0.91 | 0.81     | 0.48 | 1.36 | 0.68    | 0.51 | 0.92 | 0.173          |                         |           |
| Definite or probable ST     | Long-term vs Short-term     | 0.70   | 0.39 | 1.25 | 0.39     | 0.17 | 0.90 | 0.57    | 0.34 | 0.95 | 0.271          | 0.271                   | 0.088     |
|                             | Standard-term vs Short-term | 0.83   | 0.47 | 1.47 | 1.50     | 0.61 | 3.65 | 0.98    | 0.59 | 1.64 | 0.271          |                         |           |
|                             | Long-term vs Standard-term  | 0.47   | 0.25 | 0.89 | 0.84     | 0.37 | 1.88 | 0.58    | 0.34 | 0.98 | 0.271          |                         |           |
| Stroke                      | Long-term vs Short-term     | 1.21   | 0.78 | 1.87 | 0.90     | 0.52 | 1.54 | 1.08    | 0.77 | 1.51 | 0              | 0.397                   | 0.397     |
|                             | Standard-term vs Short-term | 0.93   | 0.60 | 1.44 | 1.25     | 0.73 | 2.14 | 1.04    | 0.74 | 1.47 | 0              |                         |           |
|                             | Long-term vs Standard-term  | 0.97   | 0.71 | 1.33 | 1.31     | 0.71 | 2.42 | 1.03    | 0.78 | 1.37 | 0              |                         |           |
| Net adverse clinical events | Long-term vs Short-term     | 0.70   | 0.41 | 1.19 | 0.95     | 0.70 | 1.30 | 0.88    | 0.67 | 1.15 | 0              | 0.328                   | 0.328     |
|                             | Standard-term vs Short-term | 0.94   | 0.78 | 1.12 | 0.69     | 0.38 | 1.24 | 0.91    | 0.77 | 1.08 | 0              |                         |           |
|                             | Long-term vs Standard-term  | 1.02   | 0.79 | 1.31 | 0.75     | 0.43 | 1.31 | 0.97    | 0.77 | 1.22 | 0              |                         |           |

**Table C2-Assessment of heterogeneity and consistency, for all endpoints in the study group with long-term arm as ≥18 months DAPT**

| Endpoints                   | Comparison                  | Direct |      |      | indirect |      |      | Network |      |      | Heterogeneity  | Consistency             |           |
|-----------------------------|-----------------------------|--------|------|------|----------|------|------|---------|------|------|----------------|-------------------------|-----------|
|                             |                             | OR     | LL   | UL   | OR       | LL   | UL   | OR      | LL   | UL   | I <sup>2</sup> | Global P>X <sup>2</sup> | Local P>z |
| All-cause death             | Long-term vs Short-term     | 1.00   | 0.72 | 1.39 | 1.51     | 1.03 | 2.21 | 1.20    | 0.90 | 1.59 | 0.082          | 0.107                   | 0.113     |
|                             | Standard-term vs Short-term | 1.25   | 0.90 | 1.74 | 0.83     | 0.54 | 1.27 | 1.12    | 0.83 | 1.50 | 0.082          |                         |           |
|                             | Long-term vs Standard-term  | 1.21   | 0.91 | 1.60 | 0.80     | 0.50 | 1.28 | 1.07    | 0.82 | 1.40 | 0.082          |                         |           |
| Cardiac death               | Long-term vs Short-term     | 1.00   | 0.29 | 3.47 | 1.29     | 0.78 | 2.16 | 1.25    | 0.78 | 2.00 | 0              | 0.709                   | 0.709     |
|                             | Standard-term vs Short-term | 1.13   | 0.75 | 1.69 | 0.87     | 0.24 | 3.15 | 1.10    | 0.75 | 1.62 | 0              |                         |           |
|                             | Long-term vs Standard-term  | 1.15   | 0.84 | 1.57 | 0.89     | 0.24 | 3.28 | 1.13    | 0.83 | 1.53 | 0              |                         |           |
| Non-cardiac death           | Long-term vs Short-term     | 2.53   | 0.98 | 6.55 | 2.18     | 1.16 | 4.10 | 2.28    | 1.35 | 3.86 | 0              | 0.800                   | 0.842     |
|                             | Standard-term vs Short-term | 1.28   | 0.76 | 2.13 | 1.48     | 0.53 | 4.10 | 1.31    | 0.83 | 2.07 | 0              |                         |           |
|                             | Long-term vs Standard-term  | 1.71   | 1.18 | 2.48 | 1.98     | 0.67 | 5.84 | 1.74    | 1.23 | 2.47 | 0              |                         |           |
| Major bleeding              | Long-term vs Short-term     | 1.61   | 1.01 | 2.55 | 2.11     | 1.21 | 3.67 | 1.79    | 1.26 | 2.56 | 0              | 0.462                   | 0.643     |
|                             | Standard-term vs Short-term | 1.42   | 0.92 | 2.20 | 1.08     | 0.61 | 1.93 | 1.29    | 0.91 | 1.82 | 0              |                         |           |
|                             | Long-term vs Standard-term  | 1.48   | 1.05 | 2.09 | 1.13     | 0.60 | 2.13 | 1.39    | 1.03 | 1.88 | 0              |                         |           |
| Any bleeding                | Long-term vs Short-term     | 2.23   | 1.07 | 4.66 | 2.65     | 1.43 | 4.91 | 2.46    | 1.61 | 3.77 | 0.311          | 0.725                   | 0.789     |
|                             | Standard-term vs Short-term | 1.52   | 1.04 | 2.22 | 1.28     | 0.53 | 3.10 | 1.46    | 1.06 | 2.02 | 0.311          |                         |           |
|                             | Long-term vs Standard-term  | 1.75   | 1.07 | 2.85 | 1.47     | 0.64 | 3.37 | 1.68    | 1.15 | 2.47 | 0.311          |                         |           |
| Myocardial infarction       | Long-term vs Short-term     | 0.85   | 0.55 | 1.32 | 0.52     | 0.33 | 0.84 | 0.67    | 0.48 | 0.94 | 0.126          | 0.159                   | 0.027     |
|                             | Standard-term vs Short-term | 0.87   | 0.66 | 1.14 | 1.40     | 0.76 | 2.58 | 0.95    | 0.71 | 1.26 | 0.126          |                         |           |
|                             | Long-term vs Standard-term  | 0.61   | 0.42 | 0.88 | 0.98     | 0.58 | 1.65 | 0.71    | 0.52 | 0.96 | 0.126          |                         |           |
| Definite or probable ST     | Long-term vs Short-term     | 0.71   | 0.32 | 1.56 | 0.41     | 0.17 | 0.98 | 0.55    | 0.30 | 1.00 | 0.319          | 0.368                   | 0.193     |
|                             | Standard-term vs Short-term | 0.83   | 0.46 | 1.50 | 1.45     | 0.50 | 4.21 | 0.95    | 0.55 | 1.63 | 0.319          |                         |           |
|                             | Long-term vs Standard-term  | 0.49   | 0.25 | 0.95 | 0.85     | 0.32 | 2.28 | 0.58    | 0.33 | 1.02 | 0.319          |                         |           |
| Stroke                      | Long-term vs Short-term     | 1.03   | 0.75 | 2.10 | 0.90     | 0.52 | 1.54 | 1.07    | 0.74 | 1.56 | 0              | 0.372                   | 0.372     |
|                             | Standard-term vs Short-term | 0.93   | 0.60 | 1.44 | 1.30     | 0.71 | 2.37 | 1.04    | 0.73 | 1.48 | 0              |                         |           |
|                             | Long-term vs Standard-term  | 0.97   | 0.71 | 1.33 | 1.36     | 0.69 | 2.67 | 1.03    | 0.77 | 1.37 | 0              |                         |           |
| Net adverse clinical events | Long-term vs Short-term     | 0.70   | 0.41 | 1.19 | 0.95     | 0.70 | 1.30 | 0.88    | 0.67 | 1.15 | 0              | 0.328                   | 0.328     |
|                             | Standard-term vs Short-term | 0.94   | 0.78 | 1.12 | 0.69     | 0.38 | 1.24 | 0.91    | 0.77 | 1.08 | 0              |                         |           |
|                             | Long-term vs Standard-term  | 1.02   | 0.79 | 1.31 | 0.75     | 0.43 | 1.31 | 0.97    | 0.77 | 1.22 | 0              |                         |           |

**Table D-Assessment of Bayesian random effects model fit and inconsistency, for all endpoints in the study group with long-term arm as  $\geq 18$  months DAPT**

| Endpoints                   | Model fit   |                                      |                  | Node-splitting inconsistency <i>P</i> -values |                         |                            |
|-----------------------------|-------------|--------------------------------------|------------------|-----------------------------------------------|-------------------------|----------------------------|
|                             | Data points | Total residual variance <sup>1</sup> | DIC <sup>2</sup> | Standard-term vs Short-term                   | Long-term vs Short-term | Long-term vs Standard-term |
| All-cause death             | 32          | 31.4                                 | 54.0             | 0.176                                         | 0.179                   | 0.187                      |
| Cardiac death               | 20          | 15.9                                 | 29.3             | 0.678                                         | 0.684                   | 0.677                      |
| Non-cardiac death           | 20          | 15.2                                 | 28.7             | 0.814                                         | 0.803                   | 0.821                      |
| Major bleeding              | 32          | 33.6                                 | 54.7             | 0.530                                         | 0.532                   | 0.521                      |
| Any bleeding                | 20          | 20.4                                 | 36.8             | 0.684                                         | 0.685                   | 0.681                      |
| Myocardial infarction       | 32          | 29.5                                 | 52.2             | 0.279                                         | 0.282                   | 0.266                      |
| Definite or probable ST     | 32          | 32.9                                 | 56.4             | 0.410                                         | 0.423                   | 0.414                      |
| Stroke                      | 32          | 29.7                                 | 50.1             | 0.798                                         | 0.766                   | 0.782                      |
| Net adverse clinical events | 18          | 15.3                                 | 28.0             | 0.429                                         | 0.427                   | 0.419                      |

<sup>1</sup>Once total residual variance approximated the number of data points, it means a good model fit; <sup>2</sup>DIC refers to deviance information criterion, lower values of DIC are better.

**Table E- GRADE quality of evidence and anticipated absolute effects of all endpoints. Long-term arm in this study group was >12 months DAPT.**

| Endpoints                          | Direct evidence            | Indirect evidence                | Network meta-analysis |                              |                                        |
|------------------------------------|----------------------------|----------------------------------|-----------------------|------------------------------|----------------------------------------|
|                                    | Quality of evidence        | Quality of evidence              | Quality of evidence   | Anticipated absolute effects |                                        |
|                                    |                            |                                  |                       | Risk with shorter DAPT       | Risk difference with longer DAPT       |
| <b>Long-term vs Short-term</b>     |                            |                                  |                       |                              |                                        |
| All-cause death                    | ⊕⊕⊕⊖ Moderate <sup>1</sup> | ⊕⊕⊖⊖ Low <sup>3,4</sup>          | Moderate              | 27 per 1,000                 | 5 more per 1,000 (2 fewer to 13 more)  |
| Cardiac death                      | ⊕⊕⊕⊖ Moderate <sup>1</sup> | ⊕⊖⊖⊖ Very low <sup>1,3,4</sup>   | Moderate              | 13 per 1,000                 | 4 more per 1,000 (2 fewer to 11 more)  |
| Non-cardiac death                  | ⊕⊕⊕⊖ Moderate <sup>1</sup> | ⊕⊕⊖⊖ Low <sup>3,4</sup>          | Moderate              | 13 per 1,000                 | 8 more per 1,000 (0 fewer to 20 more)  |
| Major bleeding                     | ⊕⊕⊕⊕ High                  | ⊕⊕⊕⊖ Moderate <sup>4</sup>       | High                  | 9 per 1,000                  | 7 more per 1,000 (2 more to 12 more)   |
| Any bleeding                       | ⊕⊕⊕⊖ Moderate <sup>2</sup> | ⊕⊖⊖⊖ Very low <sup>2,3,4</sup>   | Moderate              | 53 per 1,000                 | 53 more per 1,000 (23 more to 95 more) |
| Myocardial infarction              | ⊕⊕⊖⊖ Low <sup>1,2</sup>    | ⊕⊖⊖⊖ Very low <sup>2,3,4</sup>   | Low                   | 12 per 1,000                 | 4 fewer per 1,000 (6 fewer to 2 fewer) |
| Definite or probable ST            | ⊕⊕⊖⊖ Low <sup>1,2</sup>    | ⊕⊕⊖⊖ Low <sup>2,4</sup>          | Low                   | 5 per 1,000                  | 2 fewer per 1,000 (4 fewer to 0 fewer) |
| Stroke                             | ⊕⊕⊕⊖ Moderate <sup>1</sup> | ⊕⊕⊖⊖ Low <sup>1,4</sup>          | Moderate              | 9 per 1,000                  | 1 more per 1,000 (2 fewer to 5 more)   |
| Net adverse clinical events        | ⊕⊕⊕⊖ Moderate <sup>1</sup> | ⊕⊕⊖⊖ Low <sup>1,4</sup>          | Moderate              | 15 per 1,000                 | 2 fewer per 1,000 (5 fewer to 2 more)  |
| <b>Standard-term vs Short term</b> |                            |                                  |                       |                              |                                        |
| All-cause death                    | ⊕⊕⊖⊖ Low <sup>1,3</sup>    | ⊕⊕⊖⊖ Low <sup>1,4</sup>          | Low                   | 13 per 1,000                 | 1 more per 1,000 (2 fewer to 5 more)   |
| Cardiac death                      | ⊕⊕⊖⊖ Low <sup>1,3</sup>    | ⊕⊕⊖⊖ Low <sup>1,4</sup>          | Low                   | 10 per 1,000                 | 1 more per 1,000 (2 fewer to 6 more)   |
| Non-cardiac death                  | ⊕⊕⊖⊖ Low <sup>1,3</sup>    | ⊕⊕⊖⊖ Low <sup>1,4</sup>          | Low                   | 7 per 1,000                  | 1 more per 1,000 (2 fewer to 5 more)   |
| Major bleeding                     | ⊕⊕⊕⊖ Moderate <sup>1</sup> | ⊕⊕⊖⊖ Low <sup>1,4</sup>          | Moderate              | 6 per 1,000                  | 2 more per 1,000 (1 fewer to 5 more)   |
| Any bleeding                       | ⊕⊕⊖⊖ Low <sup>2,3</sup>    | ⊕⊖⊖⊖ Very low <sup>1,2,3,4</sup> | Low                   | 26 per 1,000                 | 28 more per 1,000 (11 more to 50 more) |
| Myocardial infarction              | ⊕⊕⊖⊖ Low <sup>1,2</sup>    | ⊕⊖⊖⊖ Very low <sup>1,2,3,4</sup> | Low                   | 14 per 1,000                 | 1 fewer per 1,000 (4 fewer to 3 more)  |
| Definite or probable ST            | ⊕⊕⊖⊖ Low <sup>1,2</sup>    | ⊕⊖⊖⊖ Very low <sup>1,2,4</sup>   | Low                   | 3 per 1,000                  | 0 fewer per 1,000 (1 fewer to 2 more)  |
| Stroke                             | ⊕⊕⊕⊖ Moderate <sup>1</sup> | ⊕⊕⊖⊖ Low <sup>1,4</sup>          | Moderate              | 5 per 1,000                  | 0 fewer per 1,000 (1 fewer to 2 more)  |
| Net adverse clinical events        | ⊕⊕⊕⊖ Moderate <sup>1</sup> | ⊕⊕⊖⊖ Low <sup>1,4</sup>          | Moderate              | 37 per 1,000                 | 3 fewer per 1,000 (8 fewer to 3 more)  |
| <b>Long-term vs Standard-term</b>  |                            |                                  |                       |                              |                                        |
| All-cause death                    | ⊕⊕⊕⊖ Moderate <sup>1</sup> | ⊕⊖⊖⊖ Very low <sup>1,3,4</sup>   | Moderate              | 18 per 1,000                 | 2 more per 1,000 (3 fewer to 7 more)   |
| Cardiac death                      | ⊕⊕⊕⊖ Moderate <sup>1</sup> | ⊕⊖⊖⊖ Very low <sup>1,3,4</sup>   | Moderate              | 10 per 1,000                 | 1 more per 1,000 (1 fewer to 5 more)   |
| Non-cardiac death                  | ⊕⊕⊕⊕ High                  | ⊕⊖⊖⊖ Very low <sup>1,3,4</sup>   | High                  | 9 per 1,000                  | 4 more per 1,000 (0 fewer to 11 more)  |
| Major bleeding                     | ⊕⊕⊕⊕ High                  | ⊕⊕⊖⊖ Low <sup>1,4</sup>          | High                  | 8 per 1,000                  | 3 more per 1,000 (0 fewer to 7 more)   |
| Any bleeding                       | ⊕⊕⊖⊖ Low <sup>2,3</sup>    | ⊕⊖⊖⊖ Very low <sup>1,2,3,4</sup> | Low                   | 46 per 1,000                 | 23 more per 1,000 (3 more to 51 more)  |
| Myocardial infarction              | ⊕⊕⊖⊖ Low <sup>2,3</sup>    | ⊕⊖⊖⊖ Very low <sup>1,2,4</sup>   | Low                   | 14 per 1,000                 | 5 fewer per 1,000 (7 fewer to 1 fewer) |
| Definite or probable ST            | ⊕⊕⊕⊖ Moderate <sup>2</sup> | ⊕⊖⊖⊖ Very low <sup>1,2,4</sup>   | Moderate              | 3 per 1,000                  | 1 fewer per 1,000 (2 fewer to 0 fewer) |
| Stroke                             | ⊕⊕⊕⊖ Moderate <sup>1</sup> | ⊕⊕⊖⊖ Low <sup>1,4</sup>          | Moderate              | 8 per 1,000                  | 0 fewer per 1,000 (2 fewer to 3 more)  |
| Net adverse clinical events        | ⊕⊕⊕⊖ Moderate <sup>1</sup> | ⊕⊕⊖⊖ Low <sup>1,4</sup>          | Moderate              | 40 per 1,000                 | 1 fewer per 1,000 (9 fewer to 8 more)  |

<sup>1</sup> Serious imprecision since 95% confidence interval includes null effect; <sup>2</sup> Serious inconsistency when  $0.16 < \tau^2 < 0.36$ ; <sup>3</sup> Strongly suspected publication bias when funnel plot is not symmetrical; <sup>4</sup> Serious indirectness because of indirect comparisons.

## References:

1. Lee BK, Kim JS, Lee OH, et al. Safety of six-month dual antiplatelet therapy after second-generation drug-eluting stent implantation: OPTIMA-C Randomised Clinical Trial and OCT Substudy. *EuroIntervention : journal of EuroPCR in collaboration with the Working Group on Interventional Cardiology of the European Society of Cardiology* 2018;13(16):1923-30. doi: 10.4244/eij-d-17-00792 [published Online First: 2017/11/07]
2. Han Y, Xu B, Jing Q, et al. A randomized comparison of novel biodegradable polymer- and durable polymer-coated cobalt-chromium sirolimus-eluting stents. *JACC Cardiovascular interventions* 2014;7(12):1352-60. doi: 10.1016/j.jcin.2014.09.001 [published Online First: 2014/12/03]
3. Hong SJ, Shin DH, Kim JS, et al. 6-Month Versus 12-Month Dual-Antiplatelet Therapy Following Long Everolimus-Eluting Stent Implantation: The IVUS-XPL Randomized Clinical Trial. *JACC Cardiovascular interventions* 2016;9(14):1438-46. doi: 10.1016/j.jcin.2016.04.036 [published Online First: 2016/05/24]
4. Byrne RA, Schulz S, Mehilli J, et al. Rationale and design of a randomized, double-blind, placebo-controlled trial of 6 versus 12 months clopidogrel therapy after implantation of a drug-eluting stent: The Intracoronary Stenting and Antithrombotic Regimen: Safety And Efficacy of 6 Months Dual Antiplatelet Therapy After Drug-Eluting Stenting (ISAR-SAFE) study. *American heart journal* 2009;157(4):620-4.e2. doi: 10.1016/j.ahj.2008.12.019 [published Online First: 2009/04/01]
5. Schulz-Schupke S, Byrne RA, Ten Berg JM, et al. ISAR-SAFE: a randomized, double-blind, placebo-controlled trial of 6 vs. 12 months of clopidogrel therapy after drug-eluting stenting. *Eur Heart J* 2015;36(20):1252-63. doi: 10.1093/eurheartj/ehu523
6. Colombo A, Chieffo A, Frasher A, et al. Second-generation drug-eluting stent implantation followed by 6- versus 12-month dual antiplatelet therapy: the SECURITY randomized clinical trial. *J Am Coll Cardiol* 2014;64(20):2086-97. doi: 10.1016/j.jacc.2014.09.008 [published Online First: 2014/09/23]
7. Feres F, Costa RA, Bhatt DL, et al. Optimized duration of clopidogrel therapy following treatment with the Endeavor zotarolimus-eluting stent in real-world clinical practice (OPTIMIZE) trial: rationale and design of a large-scale, randomized, multicenter study. *American heart journal* 2012;164(6):810-6.e3. doi: 10.1016/j.ahj.2012.09.009 [published Online First: 2012/12/01]
8. Gwon HC, Hahn JY, Park KW, et al. Six-month versus 12-month dual antiplatelet therapy after implantation of drug-eluting stents: the Efficacy of Xience/Promus Versus Cypher to Reduce Late Loss After Stenting (EXCELLENT) randomized, multicenter study. *Circulation* 2012;125(3):505-13. doi: 10.1161/circulationaha.111.059022

9. Kim B, Hong M, Shin D, et al. A new strategy for discontinuation of dual antiplatelet therapy: the RESET Trial (REal Safety and Efficacy of 3-month dual antiplatelet Therapy following Endeavor zotarolimus-eluting stent implantation). *Journal of the american college of cardiology* 2012; 60(15). <http://onlinelibrary.wiley.com/o/cochrane/clcentral/articles/809/CN-00878809/frame.html>.
10. Hahn JY, Song YB, Oh JH, et al. 6-month versus 12-month or longer dual antiplatelet therapy after percutaneous coronary intervention in patients with acute coronary syndrome (SMART-DATE): a randomised, open-label, non-inferiority trial. *Lancet* 2018;391(10127):1274-84. doi: 10.1016/s0140-6736(18)30493-8 [published Online First: 2018/03/17]
11. Nakamura M, Iijima R, Ako J, et al. Dual Antiplatelet Therapy for 6 Versus 18 Months After Biodegradable Polymer Drug-Eluting Stent Implantation. *JACC Cardiovascular interventions* 2017;10(12):1189-98. doi: 10.1016/j.jcin.2017.04.019 [published Online First: 2017/06/24]
12. Gilard M, Barragan P, Noryani AAL, et al. 6- versus 24-month dual antiplatelet therapy after implantation of drug-eluting stents in patients nonresistant to aspirin: the randomized, multicenter ITALIC trial. *J Am Coll Cardiol* 2015;65(8):777-86. doi: 10.1016/j.jacc.2014.11.008 [published Online First: 2014/12/03]
13. Valgimigli M, Campo G, Percoco G, et al. Randomized comparison of 6- versus 24-month clopidogrel therapy after balancing anti-intimal hyperplasia stent potency in all-comer patients undergoing percutaneous coronary intervention Design and rationale for the PROlonging Dual-antiplatelet treatment after Grading stent-induced Intimal hyperplasia study (PRODIGY). *American heart journal* 2010;160(5):804-11. doi: 10.1016/j.ahj.2010.07.034 [published Online First: 2010/11/26]
14. Valgimigli M, Campo G, Monti M, et al. Short- versus long-term duration of dual-antiplatelet therapy after coronary stenting: a randomized multicenter trial. *Circulation* 2012;125(16):2015-26. doi: 10.1161/circulationaha.111.071589 [published Online First: 2012/03/23]
15. Helft G, Steg PG, Le Feuvre C, et al. Stopping or continuing clopidogrel 12 months after drug-eluting stent placement: the OPTIDUAL randomized trial. *Eur Heart J* 2016;37(4):365-74. doi: 10.1093/eurheartj/ehv481 [published Online First: 2015/09/14]
16. Mauri L, Kereiakes DJ, Yeh RW, et al. Twelve or 30 months of dual antiplatelet therapy after drug-eluting stents. *The New England journal of medicine* 2014;371(23):2155-66. doi: 10.1056/NEJMoa1409312 [published Online First: 2014/11/18]
17. Lee CW, Ahn JM, Park DW, et al. Optimal duration of dual antiplatelet therapy after drug-eluting stent implantation: a randomized, controlled trial. *Circulation* 2014;129(3):304-12. doi: 10.1161/circulationaha.113.003303 [published Online First: 2013/10/08]
18. Collet JP, Cayla G, Cuisset T, et al. Randomized comparison of platelet function monitoring to adjust antiplatelet therapy versus standard of care: rationale and design of the assessment with a double randomization of (1) a fixed dose versus a monitoring-guided dose of aspirin and clopidogrel after DES implantation, and (2) treatment interruption versus continuation, 1 year after stenting (ARCTIC) study. *American heart journal* 2011;161(1):5-12.e5. doi: 10.1016/j.ahj.2010.09.029 [published Online First: 2010/12/21]

19. Park SJ, Park DW, Kim YH, et al. Duration of dual antiplatelet therapy after implantation of drug-eluting stents. *The New England journal of medicine* 2010;362(15):1374-82. doi: 10.1056/NEJMoa1001266 [published Online First: 2010/03/17]
20. Thygesen K, Alpert JS, White HD, et al. Universal definition of myocardial infarction. *Circulation* 2007;116(22):2634-53. doi: 10.1161/circulationaha.107.187397 [published Online First: 2007/10/24]
